1 Mattia Storti<sup>1</sup>, Anna Segalla<sup>1</sup>, Marco Mellon<sup>1</sup>, Alessandro Alboresi<sup>1</sup> and Tomas Morosinotto<sup>1</sup>

2

3 Department of Biology, University of Padova, 35121 Padova, Italy

4

5 Corresponding author: Tomas Morosinotto, Dipartimento di Biologia, Università di Padova, Via  
6 Ugo Bassi 58B, 35121 Padova, Italy. Tel. +390498277484, Email: [tomas.morosinotto@unipd.it](mailto:tomas.morosinotto@unipd.it)

7

8 **Regulation of electron transport is essential for photosystem I stability and plant growth**

9

10 **Short tile:** Regulation of photosynthesis is essential

11

12

13

14 The author(s) responsible for distribution of materials integral to the findings presented in this  
15 article in accordance with the policy described in the Instructions for Authors ([www.plantcell.org](http://www.plantcell.org))  
16 is Tomas Morosinotto, [tomas.morosinotto@unipd.it](mailto:tomas.morosinotto@unipd.it)

17

18

19

## 20 **Abstract**

21 Life depends on the ability of photosynthetic organisms to exploit sunlight to fix carbon dioxide  
22 into biomass. Photosynthesis is modulated by pathways such as cyclic and pseudocyclic electron  
23 flow (CEF and PCEF). CEF transfers electrons from photosystem I to the plastoquinone pool  
24 according to two mechanisms, one dependent on proton gradient regulators (PGR5/PGRL1) and the  
25 other on the type I NADH dehydrogenase (NDH) complex. PCEF uses electrons from photosystem  
26 I to reduce oxygen; in several groups of photosynthetic organisms but not in angiosperms, it is  
27 sustained by flavodiiron proteins (FLVs). PGR5/PGRL1, NDH and FLVs are all active in the moss  
28 *Physcomitrella patens*, and mutants depleted in these proteins show phenotypes under specific light  
29 regimes. Here, we demonstrated that CEF and PCEF exhibit strong functional overlap and that  
30 when one protein component is depleted, the others can compensate for most of the missing  
31 activity. When multiple mechanisms are simultaneously inactivated, however, plants show damage  
32 to photosystem I and strong growth reduction, demonstrating that mechanisms for the modulation  
33 of photosynthetic electron transport are indispensable.

34

## 35 **Introduction**

36 Oxygenic photosynthesis enables plants, algae and cyanobacteria to exploit light to fix carbon  
37 dioxide, directly or indirectly supporting the metabolism of most living organisms. In  
38 photosynthetic organisms, sunlight powers the linear electron flow (LEF) from water to NADP<sup>+</sup> via  
39 the activity of two photosystems (PS), PSII and PSI, generating NADPH and ATP to sustain  
40 cellular metabolism. Natural environmental conditions are highly variable, and sudden changes in  
41 irradiation can drastically affect the flow of excitation energy and electrons. The ATP and NADPH  
42 consumption rate is also highly dynamic because of continuous metabolic regulation (Kulheim et  
43 al., 2002; Allahverdiyeva et al., 2015; Peltier et al., 2010). Photosynthetic organisms have indeed  
44 evolved multiple mechanisms to modulate the flow of excitation energy and electrons according to  
45 metabolic constraints and environmental cues, for instance, by diverting/feeding electrons from/to  
46 the linear transport chain. These mechanisms include the cyclic electron flow (CEF) around PSI, in  
47 which electrons are transferred from photosystem I back to the plastoquinone pool, contributing to  
48 proton translocation and ATP synthesis but not to NADPH formation (Shikanai, 2014; Joliot and  
49 Johnson, 2011; Arnon and Chain, 1975; Shikanai and Yamamoto, 2017). Two distinct CEF  
50 pathways have been identified, although the precise molecular mechanisms of the electron transport  
51 reactions involved are still under debate (Nawrocki et al., 2019); one of these pathways is  
52 dependent on a chloroplast NDH complex (Shikanai et al., 1998) and the other on PGR5/PGRL1

53 (Munekage et al., 2002; DalCorso et al., 2008; Hertle et al., 2013). Another alternative electron  
54 pathway is the pseudocyclic electron flow (PCEF), in which electrons from PSI are used to reduce  
55 oxygen (O<sub>2</sub>) to water. PCEF is also known as the water-to-water cycle because H<sub>2</sub>O is split by PSII  
56 and then resynthesized when O<sub>2</sub> replaces NADP<sup>+</sup> as the final electron acceptor downstream of PSI.  
57 PCEF includes the Mehler reaction, which is important for detoxifying O<sub>2</sub><sup>-</sup> produced by PSI  
58 (Asada, 2000) but is estimated to make a limited contribution to electron transport (Driever and  
59 Baker, 2011). More recently, enzymes known as flavodiiron proteins (FLVs or FDPs) have been  
60 shown to contribute to PCEF (Allahverdiyeva et al., 2013), which is also responsible for significant  
61 transient electron transport in *Physcomitrella patens* (Gerotto et al., 2016).  
62 CEF and PCEF activities are found in all organisms that perform oxygenic photosynthesis, but the  
63 molecular machineries involved are not fully conserved and differ in various phylogenetic groups  
64 (Alboresi et al., 2019). In different species of cyanobacteria, unicellular eukaryotic algae and plants,  
65 the analysis of specific mutants has clearly shown that mechanisms for the regulation of  
66 photosynthetic electron transport play a key role in the response to dynamic environmental  
67 conditions (Suorsa et al., 2012; Yamori and Shikanai, 2016; Shikanai and Yamamoto, 2017). For  
68 example, FLV was shown to play an important role in the response to fluctuating light in different  
69 organisms (Gerotto et al., 2016; Chaux et al., 2017; Allahverdiyeva et al., 2013), while  
70 PGRL1/PGR5 have important functions under saturating or fluctuating light and anoxia (Kukuczka  
71 et al., 2014; Munekage et al., 2002; Suorsa et al., 2012). The inactivation of NDH alone has no  
72 major impact on growth and stress responses (Endo et al., 1999; Ishikawa et al., 2008; Yamori et  
73 al., 2015), although its activity seems to be essential for C4 metabolism (Ishikawa et al., 2016).  
74 In the present work, we generated mutants defective in CEF and PCEF mechanisms by  
75 simultaneously knocking out *pgrl1*, *ndhm* and *flva* in the moss *Physcomitrella patens*. The results  
76 demonstrate strong functional overlap, as when one protein was depleted, its activity was largely  
77 compensated by the others. However, plants with multiple deletions showed very severe  
78 phenotypes, demonstrating that the regulation of electron transport is indispensable for PSI stability  
79 and growth in any environmental condition.

80

## 81 **Results**

### 82 *CEF and PCEF mechanisms are fundamental for photosynthetic activity*

83 In *P. patens* plants depleted of FLVA, PGRL1, and NDHM, mechanisms for the regulation of  
84 photosynthetic electron transport are affected (Storti et al., 2019; Gerotto et al., 2016; Kukuczka et  
85 al., 2014). These plants were used to generate all combinations of double mutants (*flva-pgrl1*, *flva-*  
86 *ndhm*, *pgrl1-ndhm*) as well as triple *flva-pgrl1-ndhm* KO plants depleted in all three mechanisms in

87 the present study. In all cases, multiple independent lines for each genotype were validated for the  
88 correct insertion of the resistance cassette at the desired *loci* as well as for the absence of the  
89 expression of the corresponding gene. Moreover, triple mutant lines were generated starting from  
90 two distinct double-mutant lines (i.e., either *flva-ndhm* or *flva-pgrl1*) to further ensure that the  
91 observed plant phenotypes were not due to secondary effects in the selected genetic background  
92 (Figure S1).

93 Western blotting analysis of proteins of the photosynthetic apparatus confirmed the absence of  
94 target proteins such as FLVA and NDHM (Figure 1). FLVB was also strongly reduced in the  
95 absence of FLVA, as expected considering their heteromeric assembly (Gerotto et al., 2016). FLVA  
96 and FLVB were significantly reduced upon *pgrl1-ndhm* KO as well. No specific antibody was  
97 available for PGRL1, but its absence was verified by mass spectrometry in the parental lines  
98 (Kukuczka et al., 2014). Among the other components of the photosynthetic apparatus, PSI content  
99 was reduced, while the relative contents of ATPase, CP47 and PSBS increased in the *flva-pgrl1-*  
100 *ndhm* KO plants. Native PAGE analysis confirmed a clear reduction in PSI-LHCI content in *pgrl1-*  
101 *ndhm* KO plants and especially in the triple *flva-pgrl1-ndhm* KO plants (Figure 2B). This was  
102 confirmed by the spectroscopic evaluation of the PSI/PSII ratio (Figure 2C), which showed a strong  
103 relative reduction in active PSI upon *pgrl1-ndhm* and *flva-pgrl1-ndhm* KO. The pigment content  
104 was highly similar among the lines, with only a slight decrease in the Chl a/b content under *flva-*  
105 *pgrl1-ndhm* KO, consistent with a lower PSI content (Table S2).

106 The measurement of photosynthetic electron transport (ETR) in WT plants showed a first peak a  
107 few seconds after the light was switched on, largely due to FLV activity (Gerotto et al., 2016),  
108 which was consistently absent in all *flva*-less plants (Figure 2A-B). This first peak reduced in *pgrl1-*  
109 *ndhm* KO plants but not in the corresponding single KO mutants (Figure S2). This finding supports  
110 the hypothesis that CEF can contribute to the activation of electron transport upon dark-to-light  
111 transition, even though the reduced FLV accumulation observed in *pgrl1-ndhm* KO plants (Figure  
112 1A) can explain this observation.

113 On longer timescales, ETR increases slowly following the activation of carbon fixation, reaching a  
114 steady state after  $\approx 3$  minutes. In all double mutants (*flva-pgrl1*, *flva-ndhm*, *pgrl1-ndhm* KO),  
115 steady-state ETR was indistinguishable from that in the WT (Figure 2A-B). These mutants also  
116 exhibited an equivalent capacity to generate a proton motive force across the thylakoid membranes  
117 (Figure 2C), oxygen evolution activity (Figure 2D-E) and photosystem II yield (Figure 2F),  
118 showing that all double-mutant plants can sustain the same photosynthetic activity as WT plants  
119 under stationary conditions. The picture is completely different in triple *flva-pgrl1-ndhm* KO plants,  
120 in which the ETR capacity is greatly reduced even under steady-state photosynthesis after several



121 minutes of illumination (Figure 2B). The proton motive force and oxygen evolution are also  
122 affected, showing that simultaneous depletion of CEF and PCEF has a drastic impact on  
123 photosynthetic activity (Figure 2C-D).

124 CEF activity in *P. patens* is pronounced only in the first few seconds after light is switched on,  
125 while it is very low in a steady state (Kukuczka et al., 2014). Dark-adapted *flv* KO plants showed  
126 sustained CEF in the first seconds of illumination compared to WT (Gerotto et al., 2016). Here,  
127 DCMU-treated samples of *pgrl1-ndhm* and *flva-pgrl1-ndhm* KO plants showed reduced CEF  
128 compared to *flva-pgll* and *flva-ndhm* KO plants, supporting the idea that PGRL1 and NDH are  
129 responsible for CEF in *P. patens* (Figure S3).

130 In WT plants exposed to saturating illumination, PSI activity is limited on the donor side (Figure  
131 2H), while in *flva-pgrl1-ndhm* KO plants, PSI activity is always limited from the acceptor side  
132 (Figure 2G-H). In *flva-pgrl1-ndhm* triple KO, PSI and PSII are saturated even under dim  
133 illumination (Figure 2G, Figure S5) and show strong PQ overreduction, suggesting that electron  
134 transport is limited by PSI activity (Figure S6). This suggests that the cumulative activity of CEF  
135 and PCEF is indispensable even at low light intensities to keep the PSI acceptor side oxidated.

136

### 137 *Regulation of photosynthetic electron transport is critical for plant growth in all light conditions*

138 The impact of the mutations on plant growth was assessed by cultivation under different light  
139 regimes. All double mutants showed no major defects under non-saturating light (10-50  $\mu\text{mol}$   
140  $\text{photons m}^{-2} \text{s}^{-1}$ ), while differences emerged in more challenging conditions. All plants depleted in  
141 PGRL1 showed a growth reduction under strong constant illumination, while all plants depleted in  
142 FLVA exhibited less growth when exposed to fluctuating light (FL), as previously reported (Storti  
143 et al., 2019; Gerotto et al., 2016). A small growth reduction was also observed in *pgrl1-ndhm* KO  
144 plants exposed to light fluctuations, in contrast to both single KO mutants that provided the genetic  
145 background (Figure 3, Figure S2). The most striking observation, however, was that *flva-pgrl1-*  
146 *ndhm* triple KO plants showed a 60-75% growth reduction with respect to the WT plants in all  
147 conditions, including very low, limiting light (10  $\mu\text{mol photons m}^{-2} \text{s}^{-1}$ ). In non-saturating  
148 illumination, the phenotype of the *flva-pgrl1-ndhm* KO plants was, thus, completely different from  
149 those of all the double mutants, highlighting that the mechanisms for the regulation of  
150 photosynthetic transport are essential for plant growth.

151 Such a severe growth phenotype, however, was not present in the rich medium with 0.5% glucose  
152 and 0.05% ammonium tartrate used for plant propagation (Figure 4A). The addition of  
153 metabolizable sugars such as sucrose or glucose to the basal salt medium was indeed sufficient to  
154 restore plant growth to WT levels. Interestingly, photosynthetic functionality in these plants was not

155 recovered, and PSI/PSII and ETR remained largely depleted (Figure 4C, S8). This suggests that  
156 *flva-pgrl1-ndhm* KO mutant growth impairment is due to a reduced energy supply from  
157 photosynthesis and can be rescued by providing an external carbon source. This result also  
158 demonstrates the ability of *P. patens* to grow well under mixotrophic metabolism with most of the  
159 energy provided by organic substrates, which may be related to adaptation to ecological niches with  
160 available decomposing biomass.

161 The impact of several different parameters affecting photosynthetic metabolism was assessed to  
162 further investigate the mechanistic reason for the strong impact on growth. Plants were cultivated  
163 under saturating CO<sub>2</sub> to stimulate carbon fixation and minimize photorespiration, with 24 hours of  
164 continuous non-saturating light to avoid any dark-light transition. As shown in Figure 4B,  
165 continuous light and high CO<sub>2</sub> induced a slight increase in growth, but this was similar in mutant  
166 and WT plants. The same experiments were repeated with plants cultivated under very low light for  
167 several weeks. In this case, we observed a slight recovery of the growth rate and PSI/PSII,  
168 suggesting that PSI is indeed light damaged in *flva-pgrl1-ndhm* KO plants and that the recovery is  
169 extremely slow (Figure 4C).

170

## 171 **Discussion**

172 *Mechanisms for alternative electron transport play fundamental biological roles despite their*  
173 *apparent limited electron transport capacity*

174 CEF and PCEF regulate photosynthesis in cyanobacteria, algae and plants, and corresponding  
175 mutant lines show phenotypes under specific growth conditions such as saturating or fluctuating  
176 light (Allahverdiyeva et al., 2013; Yamori and Shikanai, 2016; Peltier et al., 2016). The analysis of  
177 triple *flva-pgrl1-ndhm* KO plants instead showed that the simultaneous depletion of CEF and PCEF  
178 drastically affects plant photosynthetic activity even under optimal growth conditions. Accordingly,  
179 *Arabidopsis* double mutants lacking both CEF activities (i.e., : *pgr5* and *chlororespiratory*  
180 *reduction/crr* depleted in the NDH complex) show strong growth phenotypes compared to WT  
181 (Munekage et al., 2004).

182 As an angiosperm, *Arabidopsis* lacks FLV, and its CEF is estimated to contribute approx. 10% of  
183 total proton motive force (pmf, (Shikanai, 2016; Avenson et al., 2005)), with a larger role in dark-  
184 light conditions or specific developmental stages (Joliot et al., 2004; Allorent et al., 2015). In *P.*  
185 *patens*, linear electron transport is estimated to represent over 95% of the total flow under steady-  
186 state photosynthesis, with a larger contribution from PCEF and CEF to pmf only being measurable  
187 during dark-to-light transitions (Figure 2 and S3) or under peculiar conditions such as anoxia  
188 (Kukuczka et al., 2014). These values are estimations of the maximal ETR capacity under saturating

189 illumination, and the actual contribution of these alternative pathways to pmf under dim light could  
190 therefore be even smaller. On the other hand, it should be considered that the estimated  
191 contributions of the individual components of CEF and PCEF to electron transport are based on the  
192 analysis of single mutants, but the presence of compensation phenomena, as demonstrated here, can  
193 lead to the underestimation of the capacity of single routes, making the overall picture more  
194 uncertain. Even considering mitigating factors, in both *A. thaliana* and *P. patens*, such a small  
195 reduction in the electron transport capacity is expected to have only a slight impact on growth if any  
196 and, thus, does not explain the strong phenotype of *Arabidopsis pgr5-crr* mutant plants (Munekage  
197 et al., 2004) and *P. patens flva-pgr11-ndhm* KO plants (Figure 3-4).

198 All these considerations clearly suggest that the main biological roles of CEF and PCEF are not to  
199 enhance but rather to modulate ETR and, in particular, to protect PSI from overreduction and  
200 consequent damage (Tiwari et al., 2016). Remarkably, in the triple *flva-pgr11-ndhm* KO plants PSI  
201 is largely photoinactivated even when exposed to highly limiting illumination ( $10 \mu\text{mol photons m}^{-2}$   
202  $\text{s}^{-1}$ , Figure 1-3). Only with prolonged exposure to a very low light intensity for several weeks was it  
203 possible to detect a recovery in PSI activity in *flva-pgr11-ndhm* KO plants (Figure 4), showing that  
204 PSI is highly unstable in these mutants. The extremely slow recovery also indicated that there is not  
205 an efficient repair mechanism for PSI, representing a drastic difference from the situation for PSII,  
206 which is continuously damaged but also efficiently repaired (Järvi et al., 2015). These data point to  
207 a protection strategy in which PSII is the main target of light damage in WT plants and is  
208 continuously repaired, while PSI is highly stable (Tikkanen et al., 2014; Larosa et al., 2018). Such a  
209 strategy provides an advantage because the damage is only concentrated on one complex and  
210 specifically on one protein, the PSII subunit D1 (Järvi et al., 2015), which can be efficiently  
211 repaired, while all other protein components have a much longer turnover. Considering that  
212 photosystems are large pigment-protein complexes that accumulate at high levels in the  
213 chloroplasts, such a strategy would be efficient in saving energy and nutrients. A further factor to be  
214 considered is that the synthesis of pigment protein complexes is potentially dangerous for the cells  
215 since pigments that are free or bound to partially assembled complexes are strong ROS producers  
216 and are easily damaged by illumination. Slowing down the turnover of these complexes and, thus,  
217 reducing the number and type of complexes that are continuously assembled may therefore  
218 represent an additional advantage.

219 As shown here, however, such a protection strategy is only effective if PSI is indeed very stable,  
220 since any damage to this complex will cause major consequences for growth because of the slow  
221 turnover and absence of efficient repair. Hence, PSI needs to be efficiently protected, which is

222 achieved by the presence of multiple, redundant mechanisms that have evolved to ensure its  
223 stability under all environmental conditions, as shown in this work.

224

225 *Regulation of electron transport adapted during evolution to balance efficiency and*  
226 *photoprotection*

227 Photosynthetic organisms present multiple mechanisms for the regulation of photosynthetic electron  
228 transport; in addition to the CEF and PCEF mechanisms discussed herein, mitochondrial respiration  
229 and photorespiration also play a significant role. The relative biological relevance of these multiple  
230 mechanisms is still debated, and the results presented here demonstrate that the biological activity  
231 of CEF and PCEF is likely underestimated from the analysis of single mutants, with the most  
232 evident example being the NDH complex. Different plant species depleted in chloroplast NDH  
233 activity show no growth effects under any light conditions and present photosynthetic properties  
234 close to WT plants (Peltier et al., 2016; Yamori and Shikanai, 2016; Ishikawa et al., 2008). A  
235 similar situation is observed in *P. patens* (Figure S2), but the situation is completely different when  
236 NDH is depleted from *flva-pgr11* KO plants, where it causes drastic impairment of photosynthetic  
237 activity. A similar phenomenon was found in *A. thaliana* when the *pgr5* and *pgr5-crr* mutants were  
238 compared (Munekage et al., 2004). Another even more surprising line of evidence that CEF and  
239 PCEF present functional overlap is provided by the demonstration that in angiosperms (both *A.*  
240 *thaliana* and rice), the expression of *P. patens* FLV complements the high-PSI-acceptor-side-  
241 limitation phenotype of CEF-depleted plants, protecting the system from photodamage under  
242 fluctuating light (Wada et al., 2018; Yamamoto et al., 2016).

243 This strong functional overlap helps to explain why CEF and PCEF mechanisms are not fully  
244 conserved in all photosynthetic organisms despite their major biological role in PSI protection. For  
245 example, FLV proteins are present and active in cyanobacteria, green algae, mosses and  
246 gymnosperms but have been lost by angiosperms and by some secondary endosymbiotic algae, such  
247 as diatoms (Ilík et al., 2017; Bellan et al., 2019; Shimakawa et al., 2018). The most parsimonious  
248 hypothesis is that FLVs were present in the prokaryotic cyanobacterial ancestor but were later  
249 independently lost at least twice in eukaryotes. Based on the functional complementarity observed  
250 here, if one mechanism for the regulation of electron transport is lost, the others are likely capable  
251 of compensating for most of the missing activity. Consistent with this idea is the observation that  
252 angiosperms are missing FLV, but they rely on CEF to respond to light fluctuations, as shown by  
253 the sensitivity of *pgr5/prgl1* KO in *Arabidopsis* to these conditions (Suorsa et al., 2012), which is  
254 not observed in *P. patens* (Storti et al., 2019). This is also consistent with the stronger CEF activity  
255 in *Arabidopsis* than in *P. patens* (Avenson et al., 2005).

256 The observation that FLV was lost at least twice during the evolution of photosynthetic organisms  
257 suggests that its activity may present some competitive disadvantages. FLV indeed drives energy  
258 loss since electrons are donated back to oxygen, generating a futile cycle with water oxidation in  
259 PSII. This energy loss is reduced by the regulation of FLV activity, which is maximal only under  
260 light fluctuations and is only detectable for a few seconds (Gerotto et al., 2016). Indeed, FLV  
261 activity is not detectable during steady-state illumination, and *flv* KO mutants exhibit ETR that is  
262 indistinguishable from that in WT plants (Gerotto et al., 2016). However, this conclusion is  
263 challenged by the comparison of *pgrl1-ndhm* KO and *flva-pgrl1-ndhm* KO plants, which only differ  
264 in the presence of FLV. These plants show a highly different phenotype in low steady illumination,  
265 demonstrating that FLV can sustain steady-state photosynthesis even in the absence of light  
266 fluctuations (Figure 3). This suggests that in WT plants, FLV could potentially accept electrons  
267 from PSI at a low, undetectable rate. Another indication that FLV is potentially constantly active is  
268 that the growth of the *pgrl1-ndhm* KO mutant of *P. patens* examined in this study is not as affected  
269 as that of the corresponding *Arabidopsis* mutant, while the phenotypes are analogous in *flva-pgrl1-*  
270 *ndhm* KO plants, suggesting that FLV indeed complements the depleted CEF activity *in vivo*. This  
271 evidence suggests that, even if it is not measurable when CEF is active, FLV potentially shows  
272 constant activity under low limiting illumination, where the use of electrons to reduce oxygen to  
273 water represents an energy loss and potentially a disadvantage that could drive FLV loss during  
274 evolution.

275 Considering the impact on PSI protection and growth when FLV is depleted, it can be asked  
276 whether FLV introduction in angiosperm crops could potentially lead to increased biomass  
277 productivity and yield. While preliminary promising results have been obtained (Wada et al., 2018),  
278 some caution is probably necessary. As discussed, it is in fact possible that FLV activity can cause  
279 low constant energy loss, and thus, improved productivity would be possible only if this energy loss  
280 is compensated by increased PSI photoprotection. According to the present literature, PSI should  
281 rarely be damaged in natural conditions, as there are only a few reports of this happening in a few  
282 species under specific chilling conditions (Tjus et al., 1998; Terashima et al., 1994). If this is the  
283 case and PSI protection mechanisms are indeed very efficient, then the introduction of FLV should  
284 have a limited impact. If instead PSI indeed experiences damage, then FLV reintroduction should  
285 provide an advantage, at least in some specific conditions.

286

## 287 **Methods**

288 *Plant material and growth.* *P. patens* (Gransden) wild-type (WT) KO lines were maintained in the  
289 protonemal stage by vegetative propagation and grown under controlled conditions: 24°C, 16 h



290 light/ 8 h dark photoperiod with 50  $\mu\text{mol photons m}^{-2}\text{s}^{-1}$  (Control light, CL) unless otherwise  
291 specified. Physiological and biochemical experiments were performed on 10-day-old plants grown  
292 in PpNO<sub>3</sub> medium. Growth in different media and light conditions was evaluated starting from  
293 protonema colonies of 2 mm in diameter and then followed for 21 days. Colony size was measured  
294 as reported in a previous study (Storti et al., 2019).

295 *Moss transformation and mutant selection.* The *pgrl1* (Gerotto et al., 2016; Kukuczka et al., 2014)  
296 construct was used to remove the *pgrl1* gene from the *ndhm* single KO genetic background (Storti  
297 et al., submitted) to obtain *pgrl1-ndhm* double KO mutants. For triple mutant isolation, the *pgrl1*  
298 construct was used to remove *pgrl1* from the *flva-ndhm* background. A similar *ndhm* KO construct  
299 (Storti et al., submitted) was used to remove the gene from the *flva-pgrl1* KO background, obtaining  
300 triple *flva-pgrl1-ndhm* KO mutant plants in both cases (Figure S1). Transformation was performed  
301 via protoplast DNA uptake as described in (Alboresi et al., 2010). After two rounds of selection, the  
302 various lines were homogenized using 3 mm zirconium glass beads (Sigma-Aldrich), and genomic  
303 DNA (gDNA) was isolated according to a rapid extraction protocol (Edwards et al., 1991) with  
304 minor modification. PCR amplification was performed on extracted gDNA (Table S1; Figure S1).  
305 RT-PCR was performed on cDNA (RevertAid Reverse Transcriptase, Thermo Scientific)  
306 synthesized after RNA extraction (Allen et al., 2006) to confirm the *pgrl1-ndhm* and *flva-pgrl1-*  
307 *ndhm* KO lines.

308 *Spectroscopic analyses.* *In vivo* chlorophyll fluorescence and P700<sup>+</sup> absorption were monitored  
309 simultaneously at room temperature with a Dual-PAM 100 system (Walz) in protonemal tissue  
310 grown for 10 days in PpNO<sub>3</sub>. Before the measurements, the plants were dark-acclimated for 40 min,  
311 and the  $F_v/F_m$  parameter was calculated as  $(F_m - F_0)/F_m$ . To determine the induction curves, actinic  
312 red light was set at 50 or 540  $\mu\text{mol photons m}^{-2}\text{s}^{-1}$ , and photosynthetic parameters were recorded  
313 every 30 s. At each step, the photosynthetic parameters were calculated as follows: Y(II) as  $(F_m' -$   
314  $F_0)/F_m'$ , qL as  $(F_m' - F)/(F_m' - F_0') \times F_0'/F$  and NPQ as  $(F_m - F_m')/F_m'$ , Y(I) as  $1 - Y(\text{ND}) - Y(\text{NA})$ ;  
315  $Y(\text{NA})$  as  $(P_m - P_m')/P_m$ ;  $Y(\text{ND})$  as  $(1 - P700 \text{ red})$ . Electrochromic shift (ECS) spectra were recorded  
316 with a JTS-10 system (Biologic) in plants that were dark adapted and soaked with 20 mM HEPES,  
317 pH 7.5. and 10 mM KCl; the 546 nm background was subtracted from the 520 nm signal.  
318 Functional photosystem quantification was performed by single flash turnover using a xenon lamp.  
319 Samples were infiltrated with 20  $\mu\text{M}$  DCMU and 4 mM HA (hydroxylamine) to eliminate the  
320 contribution of PSII. ETR was evaluated by DIRK (dark-induced relaxation kinetic) analysis as in  
321 (Gerotto et al., 2016) and normalized to the total PS content (PSI + PSII). After five minutes, the  
322 light was switched off for 20 s to follow relaxation kinetics and evaluate the proton motive force

323 generated during light treatment (Storti et al., 2019).  $gH^+$  was calculated from the half time ( $t_{1/2}$ ) of  
324 ECS relaxation in the dark after exposure to five minutes of illumination ( $940 \mu\text{mol photons m}^{-2}\text{s}^{-1}$ ).  
325 *Western blot analysis.* Total protein extracts were obtained by grinding protonemal tissues in  
326 solubilization buffer (50 mM TRIS pH 6.8, 100 mM DTT, 2% SDS and 10% glycerol). Samples  
327 were loaded so that the same amount of chlorophyll was present, and after SDS-PAGE, proteins  
328 were transferred to a nitrocellulose membrane (Pall Corporation). Membranes were hybridized  
329 with specific primary antibodies (anti-PsaA, Agrisera, catalog number AS06 172; anti-PsaD,  
330 Agrisera, catalog number AS09 461; anti-Cyt f, Agrisera, catalog number AS06 119; anti- $\gamma$ -  
331 ATPase, Agrisera, catalog number AS08 312; custom made anti-FLVA and FLVB (Gerotto et al.,  
332 2016), and custom made anti-D2, anti-CP47, anti-PSBS, anti-LHCSR and anti-NDHM) and  
333 detected with alkaline phosphatase conjugated antibody (Sigma Aldrich).  
334 *Clear native (CN) gel.* Gel were casted in 8x10 cm plates using buffer described by (Kügler et al.,  
335 1997), running gel was obtain by using an acrylamide gradient of 4-12%, and 4% acrylamide in the  
336 stacking. Thylakoids from dark adapted protonemal tissue were isolated as in (Gerotto et al., 2012)  
337 and resuspended in 25BTH20G (25mM BisTris-HCl pH 7, 20% glycerol) buffer at  $1 \mu\text{g chl/} \mu\text{l}$   
338 concentration. Thylakoids were solubilized as described in (Järvi et al., 2011), using 0.75 %  $\alpha$ -DM  
339 ( $\alpha$ -dodecylmaltoside) and adding deoxycholic acid (DOC 0.2%) to solubilized samples. Anode and  
340 cathode buffer were the same used by (Järvi et al., 2011) for CN gel, cathode buffer was addicted  
341 with 0.05% DOC and 0.02%  $\alpha$ -DM. Gel were run for 4h with increasing voltage (75-200 V).

342

#### 343 **Author contributions.**

344 T.M. and A.A. designed the research. M.S., A.S., M.M, A.A. performed experiments; M.S, A.A and  
345 T.M. analyzed the data. T.M. wrote the paper. All authors reviewed the manuscript.

346

#### 347 **Acknowledgements.**

348 AA acknowledges the financial support by the University of Padova. TM received financial support  
349 by the European Research Council (BIOLEAP grant no. 309485).

350

#### 351 **References.**

352 **Alboresi, A., Gerotto, C., Giacometti, G.M., Bassi, R., Morosinotto, T.** (2010). *Physcomitrella*  
353 *patens* mutants affected on heat dissipation clarify the evolution of photoprotection  
354 mechanisms upon land colonization. *Proc. Natl. Acad. Sci. U. S. A.* **107**: 11128–33.

355 **Alboresi, A., Storti, M., and Morosinotto, T.** (2019). Balancing protection and efficiency in the  
356 regulation of photosynthetic electron transport across plant evolution. *New Phytol.* **221**: 105–



- 357 109.
- 358 **Allahverdiyeva, Y., Mustila, H., Ermakova, M., Bersanini, L., Richaud, P., Ajlani, G.,**  
359 **Battchikova, N., Cournac, L., and Aro, E.-M.** (2013). Flavodiiron proteins Flv1 and Flv3  
360 enable cyanobacterial growth and photosynthesis under fluctuating light. *Proc. Natl. Acad. Sci.*  
361 *U. S. A.* **110**: 4111–6.
- 362 **Allahverdiyeva, Y., Suorsa, M., Tikkanen, M., and Aro, E.-M.E.-M.** (2015). Photoprotection of  
363 photosystems in fluctuating light intensities. *J. Exp. Bot.* **66**: 2427–36.
- 364 **Allen, G.C., Flores-Vergara, M.A., Krasynanski, S., Kumar, S., and Thompson, W.F.** (2006).  
365 A modified protocol for rapid DNA isolation from plant tissues using  
366 cetyltrimethylammonium bromide. *Nat. Protoc.* **1**: 2320–2325.
- 367 **Allorent, G., Osorio, S., Vu, J.L., Falconet, D., Jouhet, J., Kuntz, M., Fernie, A.R., Lerbs-**  
368 **Mache, S., Macherel, D., Courtois, F., and Finazzi, G.** (2015). Adjustments of embryonic  
369 photosynthetic activity modulate seed fitness in *Arabidopsis thaliana*. *New Phytol.* **205**: 707–  
370 19.
- 371 **Arnon, D.I. and Chain, R.K.** (1975). Regulation of ferredoxin-catalyzed photosynthetic  
372 phosphorylations. *Proc. Natl. Acad. Sci. U. S. A.* **72**: 4961–5.
- 373 **Asada, K.** (2000). The water-water cycle as alternative photon and electron sinks. *Philos. Trans. R.*  
374 *Soc. B Biol. Sci.* **355**: 1419–1431.
- 375 **Avenson, T.J., Cruz, J.A., Kanazawa, A., and Kramer, D.M.** (2005). Regulating the proton  
376 budget of higher plant photosynthesis. *Proc. Natl. Acad. Sci. U. S. A.* **102**: 9709–13.
- 377 **Bellan, A., Bucci, F., Perin, G., Alboresi, A., and Morosinotto, T.** (2019). Photosynthesis  
378 regulation in response to fluctuating light in the secondary endosymbiont alga  
379 *Nannochloropsis gaditana*. *Plant Cell Physiol.*
- 380 **Chaux, F., Burlacot, A., Mekhalfi, M., Auroy, P., Blangy, S., Richaud, P., and Peltier, G.**  
381 (2017). Flavodiiron Proteins Promote Fast and Transient O<sub>2</sub> Photoreduction  
382 in *Chlamydomonas*. *Plant Physiol.* **174**: 1825–1836.
- 383 **DalCorso, G., Pesaresi, P., Masiero, S., Aseeva, E., Schünemann, D., Finazzi, G., Joliot, P.,**  
384 **Barbato, R., and Leister, D.** (2008). A complex containing PGRL1 and PGR5 is involved in  
385 the switch between linear and cyclic electron flow in *Arabidopsis*. *Cell* **132**: 273–85.
- 386 **Driever, S.M. and Baker, N.R.** (2011). The water-water cycle in leaves is not a major alternative  
387 electron sink for dissipation of excess excitation energy when CO<sub>2</sub> assimilation is restricted.  
388 *Plant. Cell Environ.* **34**: 837–846.
- 389 **Edwards, K., Johnstone, C., and Thompson, C.** (1991). A simple and rapid method for the  
390 preparation of plant genomic DNA for PCR analysis. *Nucleic Acids Res.* **19**: 1349.

- 391 **Endo, T., Shikanai, T., Takabayashi, A., Asada, K., and Sato, F.** (1999). The role of  
392 chloroplastic NAD(P)H dehydrogenase in photoprotection. *FEBS Lett.* **457**: 5–8.
- 393 **Gerotto, C., Alboresi, A., Giacometti, G.M.G.M., Bassi, R., and Morosinotto, T.** (2012).  
394 Coexistence of plant and algal energy dissipation mechanisms in the moss *Physcomitrella*  
395 *patens*. *New Phytol.* **196**: 763–73.
- 396 **Gerotto, C., Alboresi, A., Meneghesso, A., Jokel, M., Suorsa, M., Aro, E.-M.E.M., and**  
397 **Morosinotto, T.** (2016). Flavodiiron proteins act as safety valve for electrons in  
398 *Physcomitrella patens* (National Academy of Sciences).
- 399 **Hertle, A.P., Blunder, T., Wunder, T., Pesaresi, P., Pribil, M., Armbruster, U., and Leister, D.**  
400 (2013). PGRL1 is the elusive ferredoxin-plastoquinone reductase in photosynthetic cyclic  
401 electron flow. *Mol. Cell* **49**: 511–23.
- 402 **Ilić, P., Pavlovič, A., Kouřil, R., Alboresi, A., Morosinotto, T., Allahverdiyeva, Y., Aro, E.-M.,**  
403 **Yamamoto, H., and Shikanai, T.** (2017). Alternative electron transport mediated by  
404 flavodiiron proteins is operational in organisms from cyanobacteria up to gymnosperms. *New*  
405 *Phytol.* **214**.
- 406 **Ishikawa, N., Endo, T., and Sato, F.** (2008). Electron transport activities of *Arabidopsis thaliana*  
407 mutants with impaired chloroplastic NAD(P)H dehydrogenase. *J. Plant Res.* **121**: 521–526.
- 408 **Ishikawa, N., Takabayashi, A., Noguchi, K., Tazoe, Y., Yamamoto, H., von Caemmerer, S.,**  
409 **Sato, F., and Endo, T.** (2016). NDH-Mediated Cyclic Electron Flow Around Photosystem I is  
410 Crucial for C<sub>4</sub> Photosynthesis. *Plant Cell Physiol.* **57**: 2020–2028.
- 411 **Järvi, S., Suorsa, M., and Aro, E.-M.** (2015). Photosystem II repair in plant chloroplasts —  
412 Regulation, assisting proteins and shared components with photosystem II biogenesis.  
413 *Biochim. Biophys. Acta - Bioenerg.* **1847**: 900–909.
- 414 **Järvi, S., Suorsa, M., Paakkarinen, V., and Aro, E.-M.** (2011). Optimized native gel systems for  
415 separation of thylakoid protein complexes: novel super- and mega-complexes. *Biochem. J.*  
416 **439**: 207–14.
- 417 **Joliot, P., Béal, D., and Joliot, A.** (2004). Cyclic electron flow under saturating excitation of dark-  
418 adapted *Arabidopsis* leaves. *Biochim. Biophys. Acta* **1656**: 166–76.
- 419 **Joliot, P. and Johnson, G.N.** (2011). Regulation of cyclic and linear electron flow in higher plants.  
420 *Proc. Natl. Acad. Sci. U. S. A.* **108**: 13317–22.
- 421 **Kügler, M., Jansch, L., Kruff, V., Schmitz, U.K., and Braun, H.P.** (1997). Analysis of the  
422 chloroplast protein complexes by blue-native polyacrylamide gel electrophoresis (BN-PAGE).  
423 *Photosynth. Res.* **53**: 35–44.
- 424 **Kukuczka, B., Magneschi, L., Petroustos, D., Steinbeck, J., Bald, T., Powikrowska, M.,**

- 425 **Fufezan, C., Finazzi, G., and Hippler, M.** (2014). Proton Gradient Regulation5-Like1-  
426 Mediated Cyclic Electron Flow Is Crucial for Acclimation to Anoxia and Complementary to  
427 Nonphotochemical Quenching in Stress Adaptation. *Plant Physiol.* **165**: 1604–1617.
- 428 **Kulheim, C., Agren, J., Jansson, S., Külheim, C., Agren, J., and Jansson, S.** (2002). Rapid  
429 regulation of light harvesting and plant fitness in the field. *Science* **297**: 91–3.
- 430 **Larosa, V., Meneghesso, A., La Rocca, N., Steinbeck, J., Hippler, M., Szabò, I., and**  
431 **Morosinotto, T.** (2018). Mitochondria Affect Photosynthetic Electron Transport and  
432 Photosensitivity in a Green Alga. *Plant Physiol.* **176**: 2305–2314.
- 433 **Munekage, Y., Hashimoto, M., Miyake, C., Tomizawa, K., Endo, T., Tasaka, M., and**  
434 **Shikanai, T.** (2004). Cyclic electron flow around photosystem I is essential for  
435 photosynthesis. *Nature* **429**: 579–82.
- 436 **Munekage, Y., Hojo, M., Meurer, J., Endo, T., Tasaka, M., and Shikanai, T.** (2002). PGR5 is  
437 involved in cyclic electron flow around photosystem I and is essential for photoprotection in  
438 *Arabidopsis*. *Cell* **110**: 361–71.
- 439 **Nawrocki, W.J., Bailleul, B., Cardol, P., Rappaport, F., Wollman, F.-A., and Joliot, P.** (2019).  
440 Maximal cyclic electron flow rate is independent of PGRL1 in *Chlamydomonas*. *Biochim.*  
441 *Biophys. acta. Bioenerg.*
- 442 **Peltier, G., Aro, E.-M., and Shikanai, T.** (2016). NDH-1 and NDH-2 Plastoquinone Reductases in  
443 Oxygenic Photosynthesis. *Annu. Rev. Plant Biol.* **67**: 55–80.
- 444 **Peltier, G., Tolleter, D., Billon, E., and Cournac, L.** (2010). Auxiliary electron transport  
445 pathways in chloroplasts of microalgae. *Photosynth. Res.* **106**: 19–31.
- 446 **Shikanai, T.** (2014). Central role of cyclic electron transport around photosystem I in the regulation  
447 of photosynthesis. *Curr. Opin. Biotechnol.* **26**: 25–30.
- 448 **Shikanai, T.** (2016). Regulatory network of proton motive force: contribution of cyclic electron  
449 transport around photosystem I. *Photosynth. Res.* **129**: 1–8.
- 450 **Shikanai, T., Endo, T., Hashimoto, T., Yamada, Y., Asada, K., and Yokota, A.** (1998). Directed  
451 disruption of the tobacco *ndhB* gene impairs cyclic electron flow around photosystem I. *Proc.*  
452 *Natl. Acad. Sci. U. S. A.* **95**: 9705–9.
- 453 **Shikanai, T. and Yamamoto, H.** (2017). Contribution of Cyclic and Pseudo-cyclic Electron  
454 Transport to the Formation of Proton Motive Force in Chloroplasts. *Mol. Plant* **10**: 20–29.
- 455 **Shimakawa, G., Murakami, A., Niwa, K., Matsuda, Y., Wada, A., and Miyake, C.** (2018).  
456 Comparative analysis of strategies to prepare electron sinks in aquatic photoautotrophs.  
457 *Photosynth. Res.*
- 458 **Storti, M., Alboresi, A., Gerotto, C., Aro, E.-M., Finazzi, G., and Morosinotto, T.** (2019). Role

- 459 of cyclic and pseudo-cyclic electron transport in response to dynamic light changes in  
460 *Physcomitrella patens*. *Plant. Cell Environ.* **42**: 1590–1602.
- 461 **Suorsa, M., Järvi, S., Grieco, M., Nurmi, M., Pietrzykowska, M., Rantala, M., Kangasjärvi,**  
462 **S., Paakkarinen, V., Tikkanen, M., Jansson, S., and Aro, E.-M.** (2012). PROTON  
463 GRADIENT REGULATION5 is essential for proper acclimation of *Arabidopsis* photosystem  
464 I to naturally and artificially fluctuating light conditions. *Plant Cell* **24**: 2934–48.
- 465 **Terashima, I., Funayama, S., and Sonoike, K.** (1994). The site of photoinhibition in leaves of  
466 *Cucumis sativus* L. at low temperatures is photosystem I, not photosystem II. *Planta* **193**.
- 467 **Tikkanen, M., Mekala, N.R., and Aro, E.-M.** (2014). Photosystem II photoinhibition-repair cycle  
468 protects Photosystem I from irreversible damage. *Biochim. Biophys. Acta* **1837**: 210–5.
- 469 **Tiwari, A., Mamedov, F., Grieco, M., Suorsa, M., Jajoo, A., Styring, S., Tikkanen, M., and**  
470 **Aro, E.-M.** (2016). Photodamage of iron–sulphur clusters in photosystem I induces non-  
471 photochemical energy dissipation. *Nat. Plants*: 16035.
- 472 **Tjus, S.E., Møller, B.L., and Scheller, H. V** (1998). Photosystem I is an early target of  
473 photoinhibition in barley illuminated at chilling temperatures. *Plant Physiol.* **116**: 755–64.
- 474 **Wada, S., Yamamoto, H., Suzuki, Y., Yamori, W., Shikanai, T., and Makino, A.** (2018).  
475 Flavodiiron Protein Substitutes for Cyclic Electron Flow without Competing CO<sub>2</sub>  
476 Assimilation in Rice. *Plant Physiol.* **176**: 1509–1518.
- 477 **Yamamoto, H., Takahashi, S., Badger, M.R., and Shikanai, T.** (2016). Artificial remodelling of  
478 alternative electron flow by flavodiiron proteins in *Arabidopsis*. *Nat. plants* **2**: 16012.
- 479 **Yamori, W. and Shikanai, T.** (2016). Physiological Functions of Cyclic Electron Transport  
480 Around Photosystem I in Sustaining Photosynthesis and Plant Growth. *Annu. Rev. Plant Biol.*  
481 **67**: 81–106.
- 482 **Yamori, W., Shikanai, T., and Makino, A.** (2015). Photosystem I cyclic electron flow via  
483 chloroplast NADH dehydrogenase-like complex performs a physiological role for  
484 photosynthesis at low light. *Sci. Rep.* **5**: 13908.

485

486

#### 487 **Figure legends.**

488 **Figure 1. Impact of mutations on the photosynthetic apparatus composition.** A) Immunoblot  
489 analysis of various proteins of the photosynthetic apparatus. A total extract amount equivalent to 2  
490 µg of Chl (for FLVB, PsaD, D2, CP47, Cyt f, γATpase, PSBS, and LHCSR) and 4 µg of Chl (for  
491 PSAA, NDHM and FLVA) was loaded for each sample. In the case of WT, 2X and 0.5X indicate  
492 the loading of twice and half the amount of extract, respectively. B) Clear native PAGE (4-12%

493 acrylamide), thylakoids solubilized with mild detergent (0.75%  $\alpha$ DM). For each lane, a volume of  
494 extract corresponding to 15  $\mu$ g of Chl was loaded. C) PSI/PSII ratio quantified from the ECS signal  
495 obtained after the application of a single turnover pulse (see Materials and Methods). For each  
496 genotype, the average result from two independent lines is reported with a total of  $n > 6$   
497 independent biological replicates (one-way ANOVA,  $p < 0.001$  is indicated by an asterisk).

498

499 **Figure 2. Photosynthetic electron transfer in *P. patens* plants.** A-B) Electron transport rate of  
500 dark-acclimated plants grown under dim light, calculated from the electrochromic shift signal under  
501 saturating light (940  $\mu$ mol photons  $m^{-2} s^{-1}$ ). Activity was normalized to the total photosystem  
502 (PSI+PSII) content. Standard deviation is also reported ( $n > 7$ ). All genotypes are significantly  
503 different from WT after 0.8 seconds of illumination, while only *flva-pgr11-ndhm* is different from  
504 WT after 300 seconds (T-test,  $p < 0.01$ , indicated by an asterisk). C) Proton motive force (pmf)  
505 estimated from the ECS signal at a steady state (after 5 minutes of illumination). Traces are shown  
506 in Figure S4. *flva-pgr11-ndhm* is significantly different from WT and all double mutants ( $n > 7$ ). D)  
507 Gross oxygen evolution under saturating (800  $\mu$ mol photons  $m^{-2} s^{-1}$ ) light. E) Oxygen consumption  
508 in the dark measured in dark-acclimated plants. An asterisk indicates statistical significance (one-  
509 way ANOVA,  $p < 0.001$ ,  $n > 15$ ). F) The PSII quantum yield, as indicated by  $F_v/F_m$ , was evaluated in  
510 plants cultivated in control conditions ( $n > 10$ ,  $p < 0.001$ ). In C-F plots, the 25<sup>th</sup> and 75<sup>th</sup> percentiles  
511 are delimited by boxes, while whiskers indicate the minimum and maximum values. G-H) PSI  
512 yield, PSI donor (Y ND) and acceptor side (Y NA) limitation upon exposure to limiting (G, 50  
513  $\mu$ mol photons  $m^{-2} s^{-1}$ ) or saturating (H, 1000  $\mu$ mol photons  $m^{-2} s^{-1}$ ) light. The full kinetics are shown  
514 in Figure S5. Data are shown as the average  $\pm$  SD, and asterisks indicate values significantly  
515 different from those in the WT ( $n > 4$ ,  $p < 0.001$ ). The WT is shown in black, *flva-pgr11* in cyan,  
516 *flva-ndhm* in green, *pgr11-ndhm* in blue and *flva-pgr11-ndhm* in red.

517

518 **Figure 3. Impact of the depletion of electron transport regulation on *P. patens* growth.** *P.*  
519 *patens* WT and mutant plants were grown under illumination of different intensities, ranging from  
520 limiting (LL, 10  $\mu$ mol photons  $m^{-2} s^{-1}$ ) to optimal (CL, 50  $\mu$ mol photons  $m^{-2} s^{-1}$ ) or excessive (ML  
521 and HL, 150 and 500  $\mu$ mol photons  $m^{-2} s^{-1}$ ). Cells were also exposed to light fluctuations (FL) in  
522 which 3 minutes at 525  $\mu$ mol photons  $m^{-2} s^{-1}$  was followed by 9 minutes at 25  $\mu$ mol photons  $m^{-2} s^{-1}$ .  
523 Representative images (A) and growth quantification (B) of 21-day-old plants. Images of plants  
524 showing statistically significantly different growth from the WT are highlighted in green. Examples  
525 of growth curves are shown in Supplementary Figure S7. In B, the plot depicts the median and 25-  
526 75 percentiles in boxes and the minimum and maximum values as whiskers, with individual data

527 points superimposed on the boxes. WT is shown in black, *flva-pgrl1* in cyan, *flva-ndhm* in green,  
528 *pgrl1-ndhm* in blue and *flva-pgrl1-ndhm* in red. Asterisks indicate genotypes with significant  
529 differences from WT when grown in the same conditions (one-way ANOVA,  $n = 8-21$ ,  $p < 0.001$ ).

530

531 **Figure 4. Growth and active photosystem content in WT and *flva-pgrl1-ndhm* KO mutants**  
532 **under different conditions.** A) WT and *flva-pgrl1-ndhm* plants were cultivated at  $50 \mu\text{mol photons}$   
533  $\text{m}^{-2} \text{s}^{-1}$  with different media: minimum medium ( $\text{PpNO}_3$ ), rich medium ( $\text{PpNH}_4$ ) and minimum  
534 medium with the addition of ammonium tartrate (0.05%), glucose (0.5%), sucrose (0.5%) and  
535 mannitol (0.5%). B) WT and *flva-pgrl1-ndhm* KO growth in an atmosphere enriched with 5%  $\text{CO}_2$   
536 with 24 hours of continuous illumination in control conditions using plants propagated for at least 3  
537 weeks under low illumination (LL,  $10 \mu\text{mol m}^{-2} \text{s}^{-1}$ ). In both A-B, growth is normalized to the area  
538 of WT plants grown in  $\text{PpNO}_3$  medium under a 16 h light/ 8 h dark photoperiod at  $50 \mu\text{mol photons}$   
539  $\text{m}^{-2} \text{s}^{-1}$ . The plot depicts the median and 25-75 percentiles in boxes and the minimum and maximum  
540 values as whiskers, with individual data points superimposed on the boxes. For each condition, WT  
541 is shown in black, and *flva-pgrl1-ndhm* KO is shown in red. C) Spectroscopic quantification of the  
542 active PSI / PSII ratio in WT and *flva-pgrl1-ndhm* KO plants cultivated in the presence of glucose  
543 and in plants propagated under very low illumination. For all samples, between 4 and 8 independent  
544 biological replicates were performed.



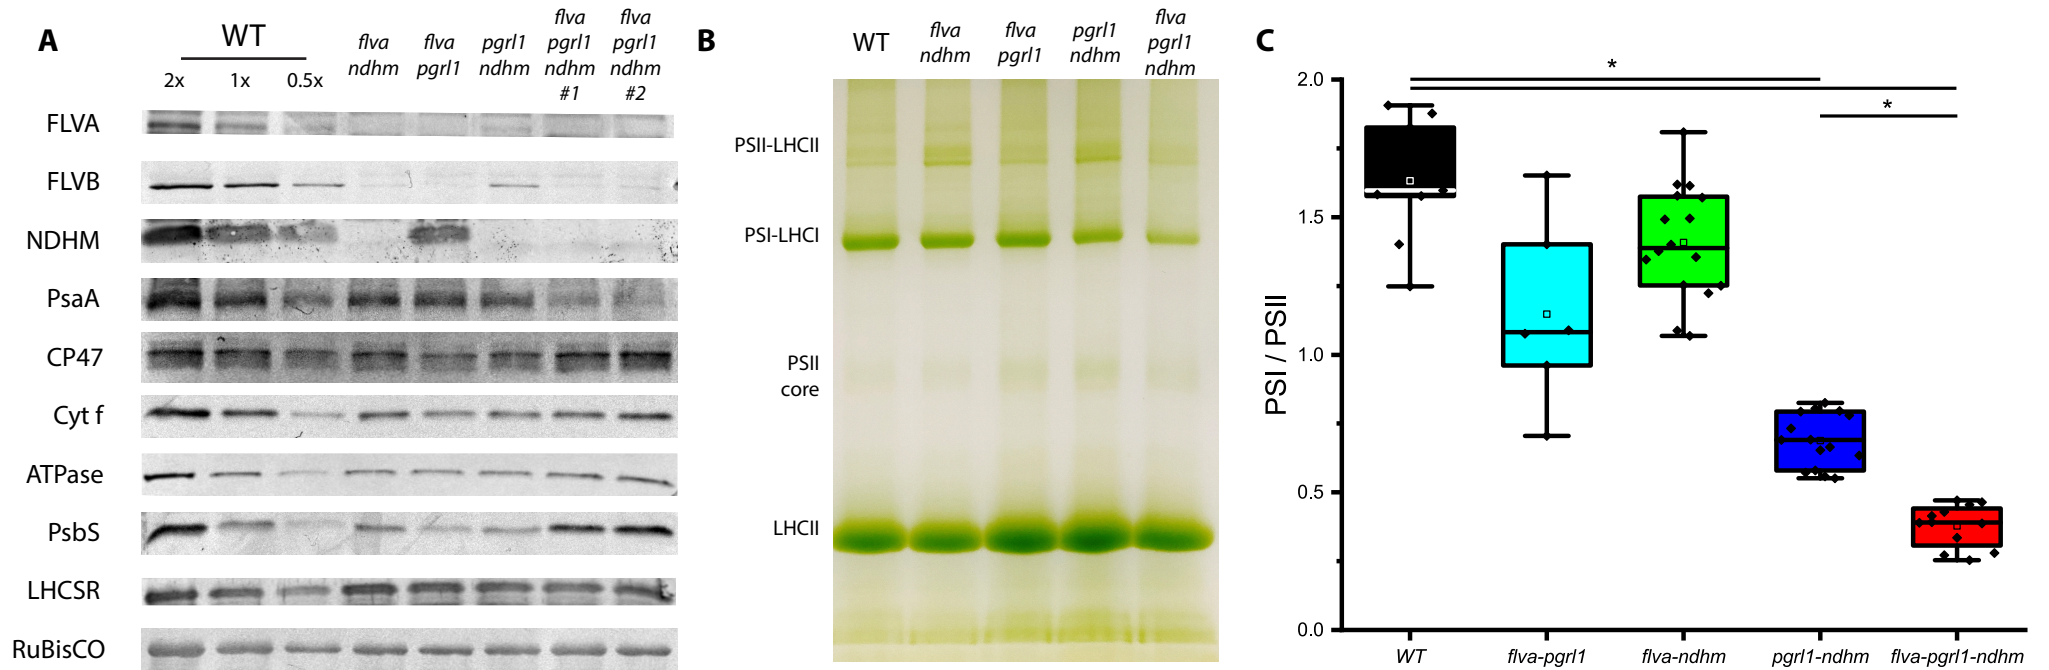

Figure 1. Impact of mutations on the photosynthetic apparatus composition. A) Immunoblot analysis of various proteins of the photosynthetic apparatus. A total extract amount equivalent to 2  $\mu\text{g}$  of Chl (for FLVB, PsaD, D2, CP47, Cyt f,  $\gamma$ ATpase, PSBS, and LHCSR) and 4  $\mu\text{g}$  of Chl (for PSAA, NDHM and FLVA) was loaded for each sample. In the case of WT, 2X and 0.5X indicate the loading of twice and half the amount of extract, respectively. B) Clear native PAGE (4-12% acrylamide), thylakoids solubilized with mild detergent (0.75%  $\alpha$ DM). For each lane, a volume of extract corresponding to 15  $\mu\text{g}$  of Chl was loaded. C) PSI/PSII ratio quantified from the ECS signal obtained after the application of a single turnover pulse (see Materials and Methods). For each genotype, the average result from two independent lines is reported with a total of  $n > 6$  independent biological replicates (one-way ANOVA,  $p < 0.001$  is indicated by an asterisk).



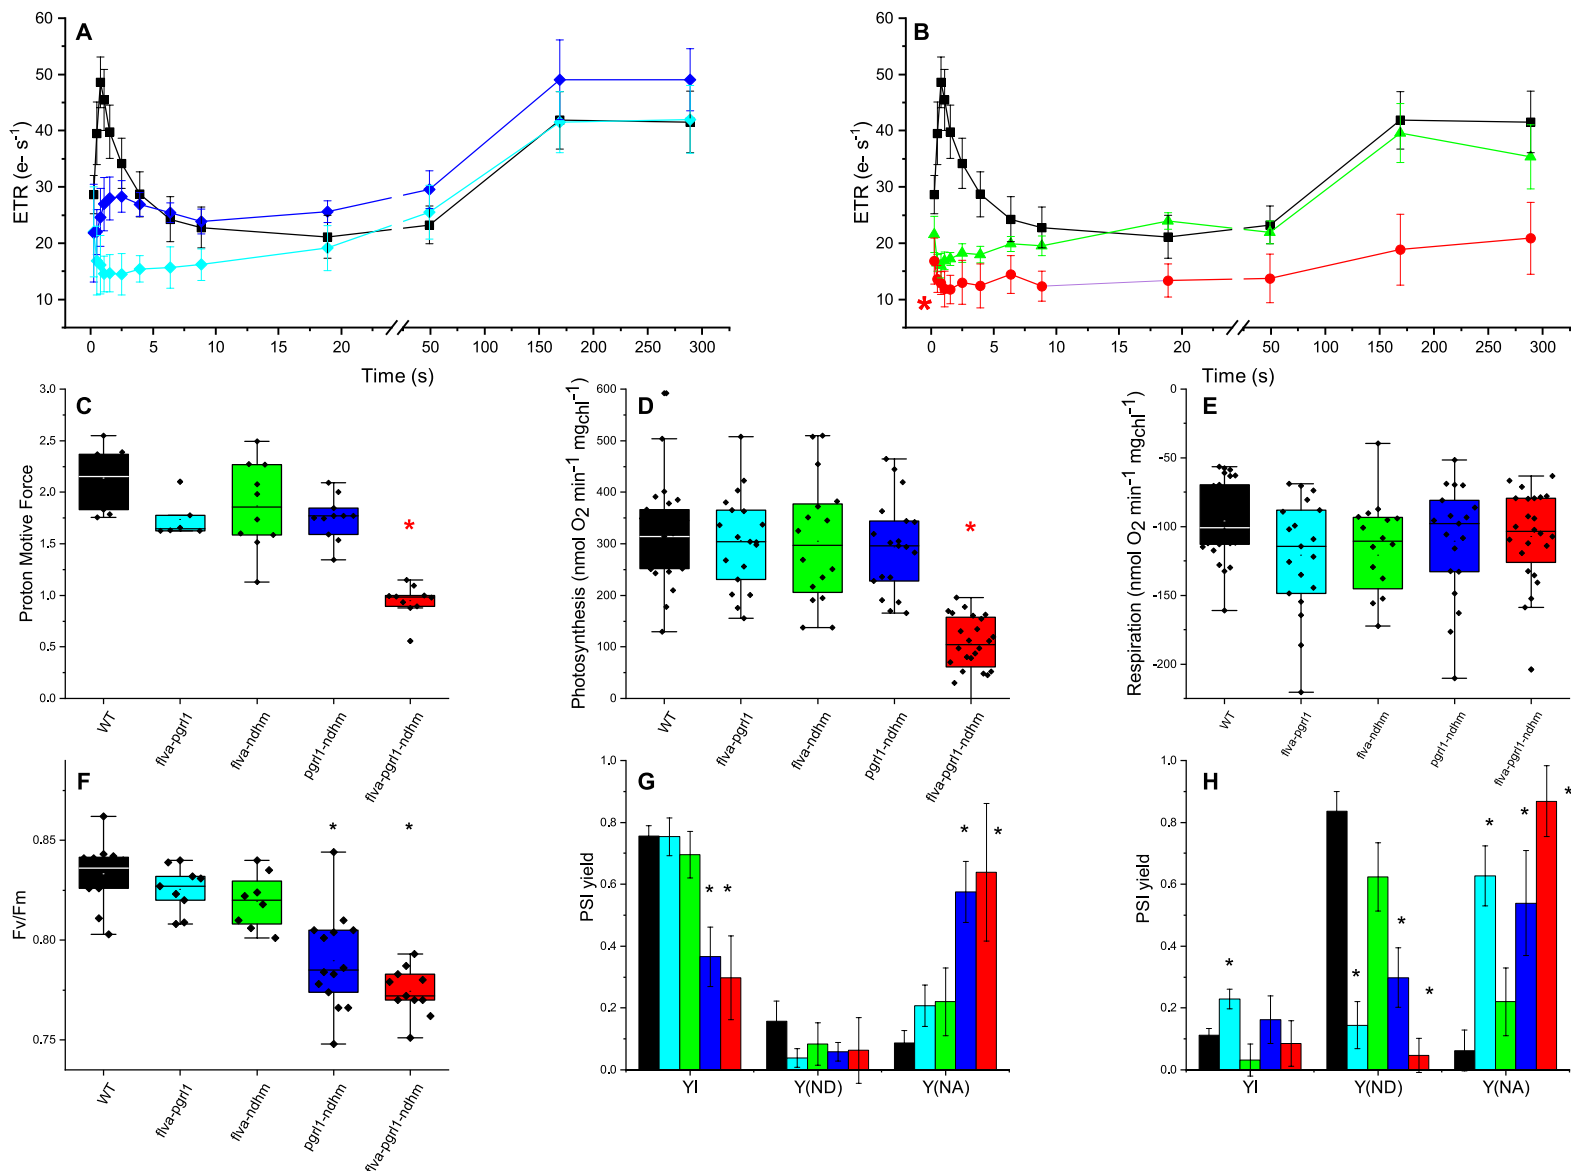

Figure 2. Photosynthetic electron transfer in *P. patens* plants. A-B) Electron transport rate of dark-acclimated plants grown under dim light, calculated from the electrochromic shift signal under saturating light (940  $\mu$ mol photons m<sup>-2</sup> s<sup>-1</sup>). Activity was normalized to the total photosystem (PSI+PSII) content. Standard deviation is also reported ( $n > 7$ ). All genotypes are significantly different from WT after 0.8 seconds of illumination, while only *flva-pgr11-ndhm* is different from WT after 300 seconds (T-test,  $p < 0.01$ , indicated by an asterisk). C) Proton motive force (pmf) estimated from the ECS signal at a steady state (after 5 minutes of illumination). Traces are shown in Figure S4. *flva-pgr11-ndhm* is significantly different from WT and all double mutants ( $n > 7$ ). D) Gross oxygen evolution under saturating (800  $\mu$ mol photons m<sup>-2</sup> s<sup>-1</sup>) light. E) Oxygen consumption in the dark measured in dark-acclimated plants. An asterisk indicates statistical significance (one-way ANOVA,  $p < 0.001$ ,  $n > 15$ ). F) The PSII quantum yield, as indicated by Fv/Fm, was evaluated in plants cultivated in control conditions ( $n > 10$ ,  $p < 0.001$ ). In C-F plots, the 25th and 75th percentiles are delimited by boxes, while whiskers indicate the minimum and maximum values. G-H) PSI yield, PSI donor (Y ND) and acceptor side (Y NA) limitation upon exposure to limiting (G, 50  $\mu$ mol photons m<sup>-2</sup> s<sup>-1</sup>) or saturating (H, 1000  $\mu$ mol photons m<sup>-2</sup> s<sup>-1</sup>) light. The full kinetics are shown in Figure S5. Data are shown as the average  $\pm$  SD, and asterisks indicate values significantly different from those in the WT ( $n > 4$ ,  $p < 0.001$ ). The WT is shown in black, *flva-pgr11* in cyan, *flva-ndhm* in green, *pgr11-ndhm* in blue and *flva-pgr11-ndhm* in red.

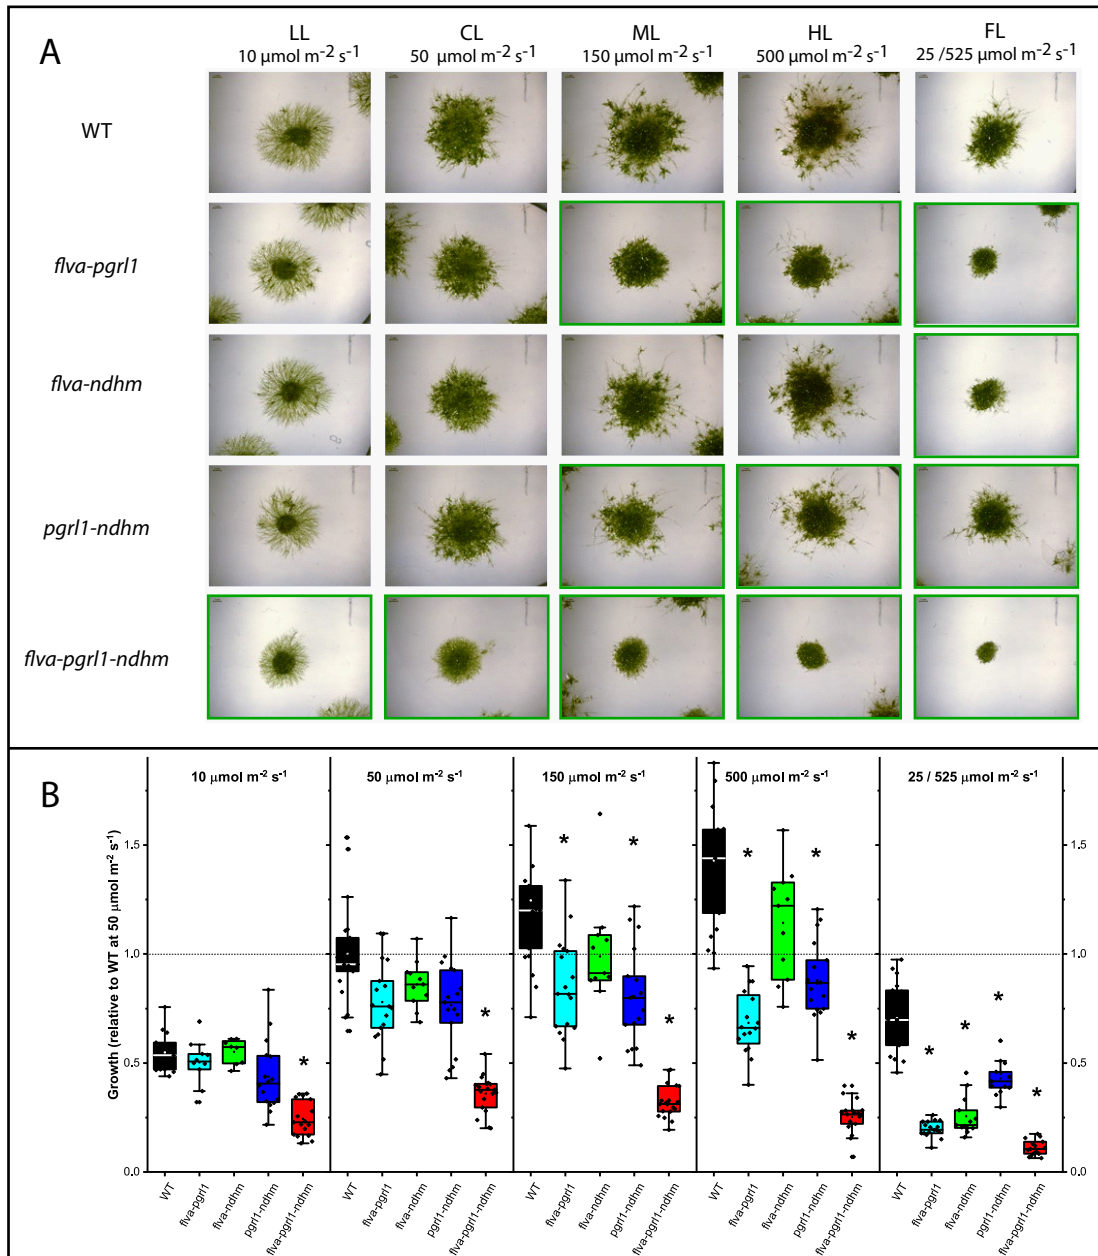

Figure 3. Impact of the depletion of electron transport regulation on *P. patens* growth. *P. patens* WT and mutant plants were grown under illumination of different intensities, ranging from limiting (LL, 10  $\mu\text{mol photons m}^{-2} \text{s}^{-1}$ ) to optimal (CL, 50  $\mu\text{mol photons m}^{-2} \text{s}^{-1}$ ) or excessive (ML and HL, 150 and 500  $\mu\text{mol photons m}^{-2} \text{s}^{-1}$ ). Cells were also exposed to light fluctuations (FL) in which 3 minutes at 525  $\mu\text{mol photons m}^{-2} \text{s}^{-1}$  was followed by 9 minutes at 25  $\mu\text{mol photons m}^{-2} \text{s}^{-1}$ . Representative images (A) and growth quantification (B) of 21-day-old plants. Images of plants showing statistically significantly different growth from the WT are highlighted in green. Examples of growth curves are shown in Supplementary Figure S7. In B, the plot depicts the median and 25-75 percentiles in boxes and the minimum and maximum values as whiskers, with individual data points superimposed on the boxes. WT is shown in black, *flva-pgrl1* in cyan, *flva-ndhm* in green, *pgrl1-ndhm* in blue and *flva-pgrl1-ndhm* in red. Asterisks indicate genotypes with significant differences from WT when grown in the same conditions (one-way ANOVA,  $n = 8-21$ ,  $p < 0.001$ ).

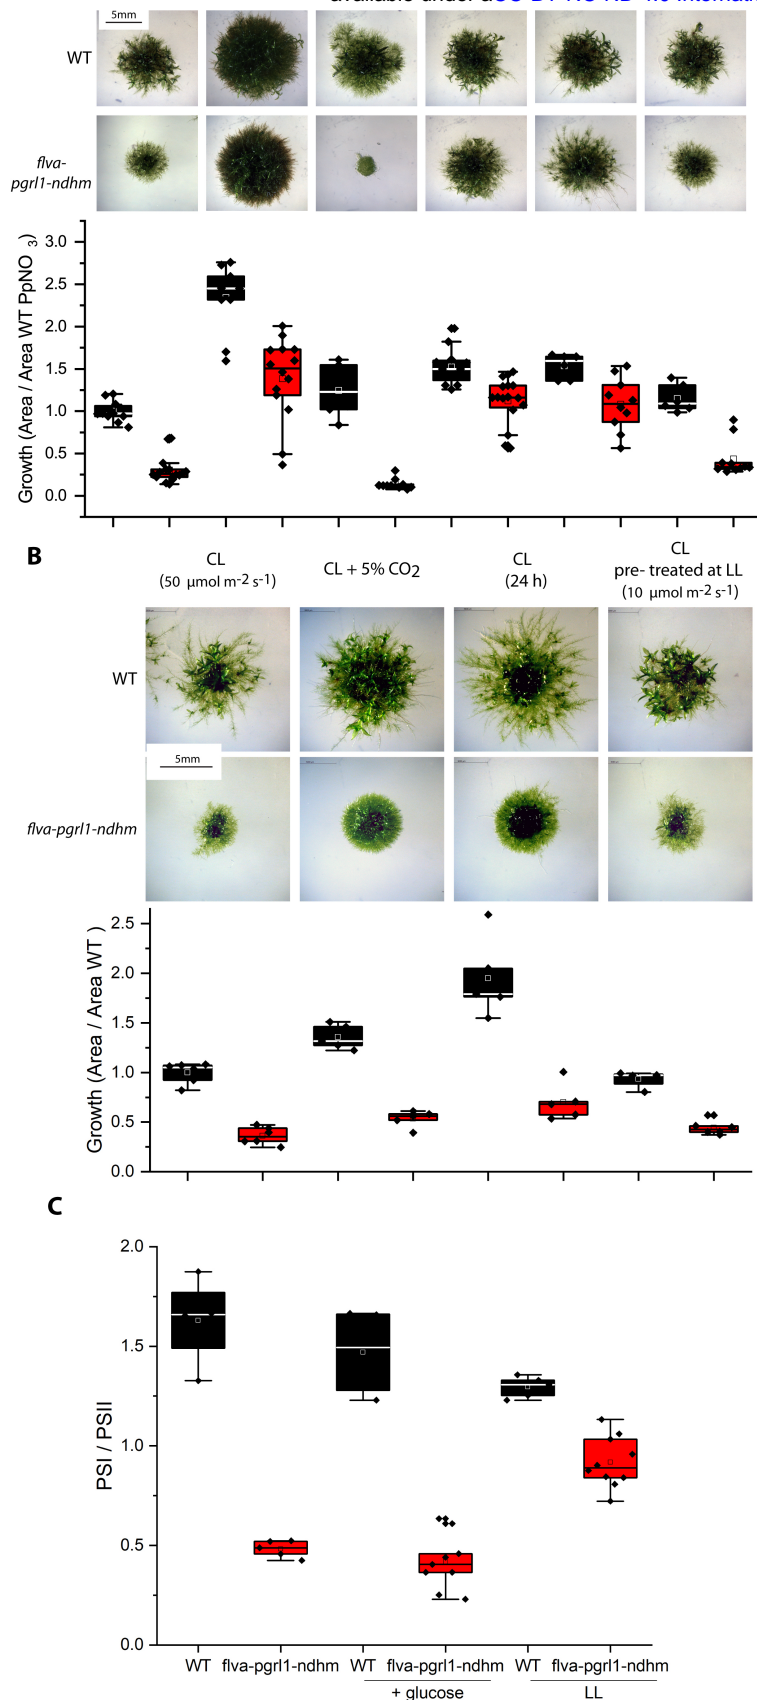

Figure 4. Growth and active photosystem content in WT and *flva-pgrl1-ndhm* KO mutants under different conditions. A) WT and *flva-pgrl1-ndhm* plants were cultivated at 50  $\mu\text{mol photons m}^{-2} \text{s}^{-1}$  with different media: minimum medium (PpNO<sub>3</sub>), rich medium (PpNH<sub>4</sub>) and minimum medium with the addition of ammonium tartrate (0.05%), glucose (0.5%), sucrose (0.5%) and mannitol (0.5%). B) WT and *flva-pgrl1-ndhm* KO growth in an atmosphere enriched with 5% CO<sub>2</sub> with 24 hours of continuous illumination in control conditions using plants propagated for at least 3 weeks under low illumination (LL, 10  $\mu\text{mol m}^{-2} \text{s}^{-1}$ ). In both A-B, growth is normalized to the area of WT plants grown in PpNO<sub>3</sub> medium under a 16 h light / 8 h dark photoperiod at 50  $\mu\text{mol photons m}^{-2} \text{s}^{-1}$ . The plot depicts the median and 25-75 percentiles in boxes and the minimum and maximum values as whiskers, with individual data points superimposed on the boxes. For each condition, WT is shown in black, and *flva-pgrl1-ndhm* KO is shown in red. C) Spectroscopic quantification of the active PSI / PSII ratio in WT and *flva-pgrl1-ndhm* KO plants cultivated in the presence of glucose and in plants propagated under very low illumination. For all samples, between 4 and 8 independent biological replicates were performed.

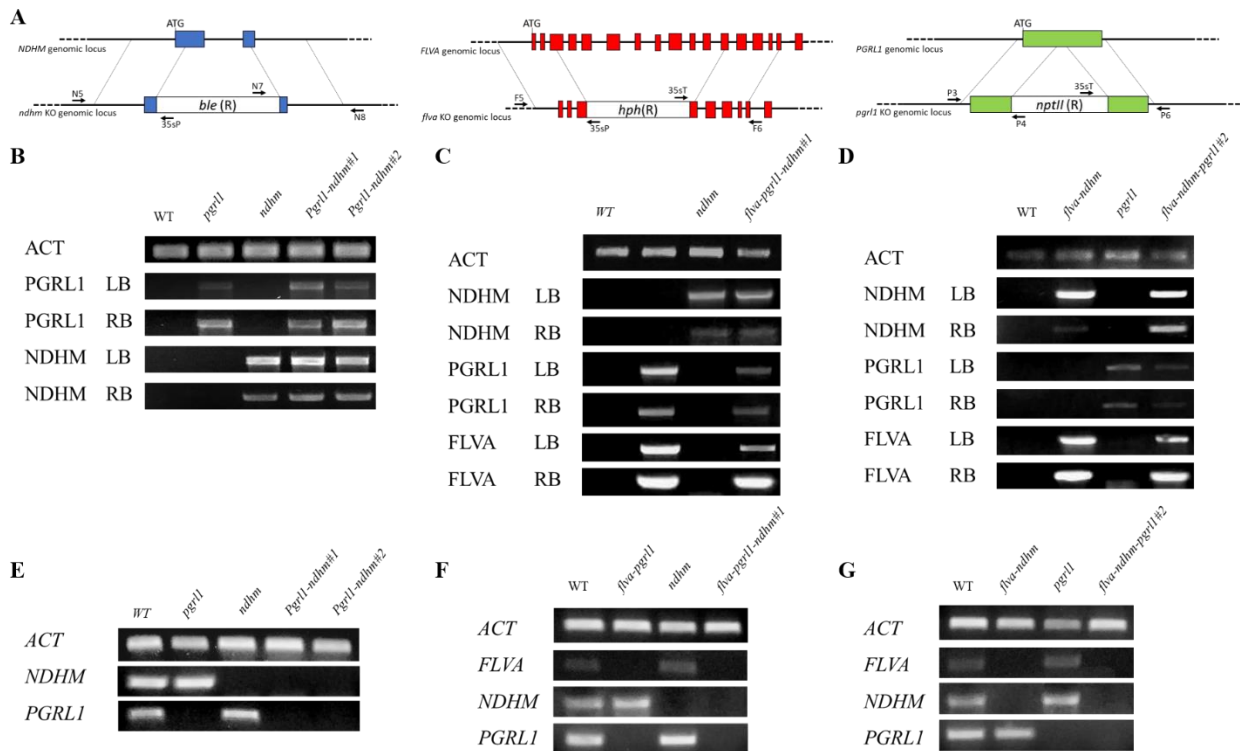

**Figure S1. Isolation of double and triple KO *P. patens* plants.** A) Scheme of the KO generation by homologous recombination. Two homologous regions drive the insertion of the resistance cassette disrupting the target gene. NDHM, PGRL1 and FLV exons are respectively shown in blue, red and green. *ble*, *hph* and *nptII* genes confer respectively the resistance to zeocin, hygromicine-B and G418. B- D) Homologous recombination event was first verified by PCR on gDNA confirming insertion of resistance cassettes in the target *loci*. Left and right borders (LB / RB) PCR were performed with one primer annealing outside the insertion locus and one annealing on the resistance cassette as shown in A. Primer sequences are reported in Table S1. E-G) Expression of the target genes was assessed by RT-PCR. Single KO as well as *flva-pgr11* and *flva-ndhm* KO isolation was previously described (Storti et al., 2019), here results for *pgr11-ndhm* and *flva-pgr11-ndhm* KO are reported. Two independent lines for each genotype are shown. In the case of *flva-pgr11-ndhm* KO the two independent lines were generated starting from two distinct mutant backgrounds (*flva-pgr11* and *flva-ndhm* respectively in C, D).

| Gene           | Primer name | Sequence                 | Use          |
|----------------|-------------|--------------------------|--------------|
| <i>FLVA</i>    | F5          | CGCTGAAATCACCAGTCTCTCT   | KO screening |
| <i>FLVA</i>    | F6          | GCTAAGCGCAGCAACACTTT     | KO screening |
| <i>PGRL1</i>   | P3          | TAAAAAATCAAGTGATGTTATCCA | KO screening |
| <i>PGRL1</i>   | P6          | AGGAACTGAGAGTACATATGGTGA | KO screening |
| <i>NDHM</i>    | N5          | TTGGAAGTCTGTTCCACGCTTT   | KO screening |
| <i>NDHM</i>    | N8          | TTCTGCCAATAGGATGTGAGG    | KO screening |
| 35s promoter   | 35sP        | GTGTCGTGCTCCACCATGT      | KO screening |
| 35s terminator | 35sT        | CGCTGAAATCACCAGTCTCTCT   | KO screening |
| <i>nptII</i>   | P4          | GGCAATGGAATCCGAGGAGGT    | KO screening |
| <i>ble</i>     | N7          | CCCCGCTTAAAATTGGTAT      | KO screening |
| <i>FLVA</i>    | FF          | TTTGCTCTTTCGGGTGGAG      | RT-PCR       |
| <i>FLVA</i>    | FR          | GACGGTTTTTCGCCAGGTTTG    | RT-PCR       |
| <i>PGRL1</i>   | PF          | CCATCCAACAACGTCAA        | RT-PCR       |
| <i>PGRL1</i>   | PR          | TTCAGCCAAAGGGCTCTCTA     | RT-PCR       |
| <i>NDHM</i>    | NF          | AGTGTCTCCGCTTTTCTCA      | RT-PCR       |
| <i>NDHM</i>    | NR          | CTCCGTCAAATCTGCACCTG     | RT-PCR       |
| <i>ACTIN2</i>  | ACTIN2F     | GCGAAGAGCGAGTATGACGAG    | RT-PCR       |
| <i>ACTIN2</i>  | ACTIN2R     | AGCCACGAATCTAACTTGTGATG  | RT-PCR       |

**Table S1. Primers employed in this work.**

**Table S2. Pigment composition of *P. patens* WT and mutant plants.** Chlorophyll (Chl) a/b ratio, Chl / carotenoids (car) ratio and total Chl content is shown. Standard deviation is also reported and asterisk indicates statistically significant differences ( $n > 5$ ,  $p < 0.01$ ).

|                        | <b>Chl a/Chl b</b> | <b>chl/car</b>  | <b>Chl content<br/>(<math>\mu\text{g mg}^{-1}</math> dry weight)</b> |
|------------------------|--------------------|-----------------|----------------------------------------------------------------------|
| <b>WT</b>              | $2.53 \pm 0.10$    | $3.74 \pm 0.35$ | $18.9 \pm 4.6$                                                       |
| <i>flva-ndhm</i>       | $2.50 \pm 0.08$    | $3.80 \pm 0.22$ | $21.6 \pm 3.4$                                                       |
| <i>flva-pgrl1</i>      | $2.49 \pm 0.12$    | $3.70 \pm 0.36$ | $19.6 \pm 3.8$                                                       |
| <i>pgrl1-ndhm</i>      | $2.51 \pm 0.10$    | $3.54 \pm 0.35$ | $17.8 \pm 2.9$                                                       |
| <i>flva-pgrl1-ndhm</i> | $2.40 \pm 0.11^*$  | $3.78 \pm 0.67$ | $21.5 \pm 5.1$                                                       |



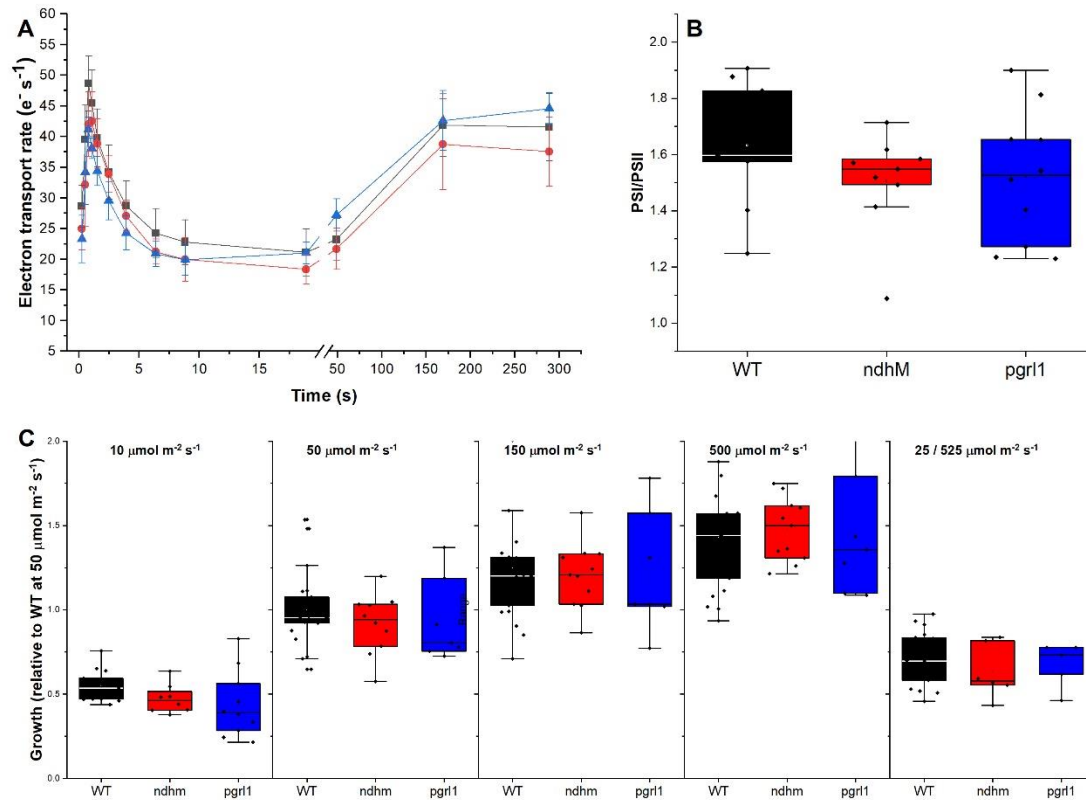

**Figure S2. Phenotype of *pgr1* and *ndhm* KO.** A) Electron transport rate, calculated from electrochromic shift, of dark acclimated plants after illumination with saturating light ( $940 \mu mol photons m^{-2} s^{-1}$ ) for 300s. Electron transport was normalized to total charge separation capacity (thus to the activity of both PSI and PSII) quantified from single turnover pulse excitation. Data are represented as mean and standard deviation is also reported ( $n > 10$ ). B) PSI/PSII ratio calculated from single pulse excitation. PSI contribution was measured in presence of DCMU that inhibits PSII activity. C) Quantification of the growth of *P. patens* WT and *pgr1* and *ndhm* KO grown under illumination of different intensity: limiting (LL,  $10 \mu mol photons m^{-2} s^{-1}$ ), optimal (CL,  $50 \mu mol photons m^{-2} s^{-1}$ ), excess light (ML and HL,  $150$  and  $500 \mu mol photons m^{-2} s^{-1}$ ); or light fluctuations (FL, 3 minutes at  $525 \mu mol photons m^{-2} s^{-1}$  and 9 minutes at  $25 \mu mol photons m^{-2} s^{-1}$ ). In B and C, plots depict median and 25-75 percentiles as boxes, minimum and maximum values as whiskers and outliers as external points, individual data points are also superimposed to the boxes. In all panels WT is shown in black, *ndhm* in red and *pgr1* in blue.



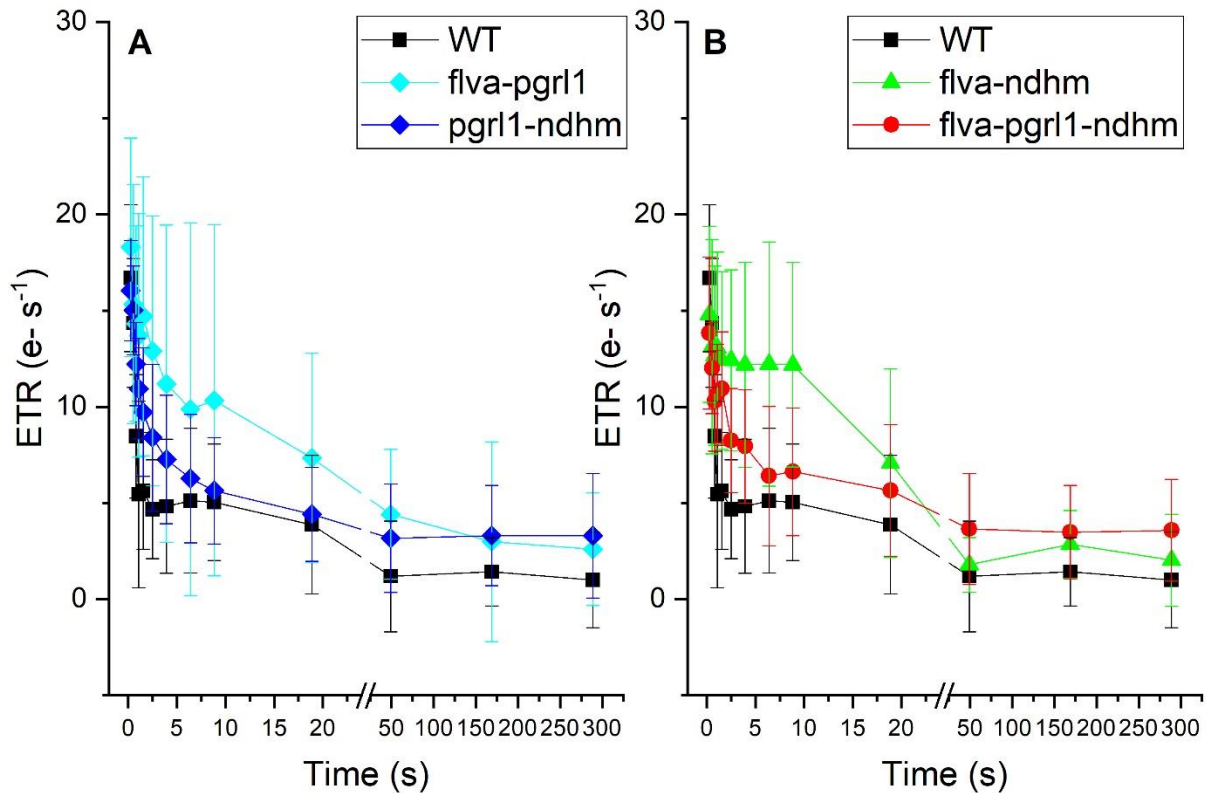

**Figure S3. PSII independent electron transport.** Photosynthetic electron transport, calculated from electrochromic shift signal, measured in the presence of the PSII inhibitor DCMU. Activity was normalized to total photosystems content (PSI+PSII). Mean values and standard deviation are reported ( $n > 6$ ). WT is shown in black, *flva-pgrl1* in cyan, *flva-ndhm* in green, *pgrl1-ndhm* in blue and *flva-pgrl1-ndhm* in red.

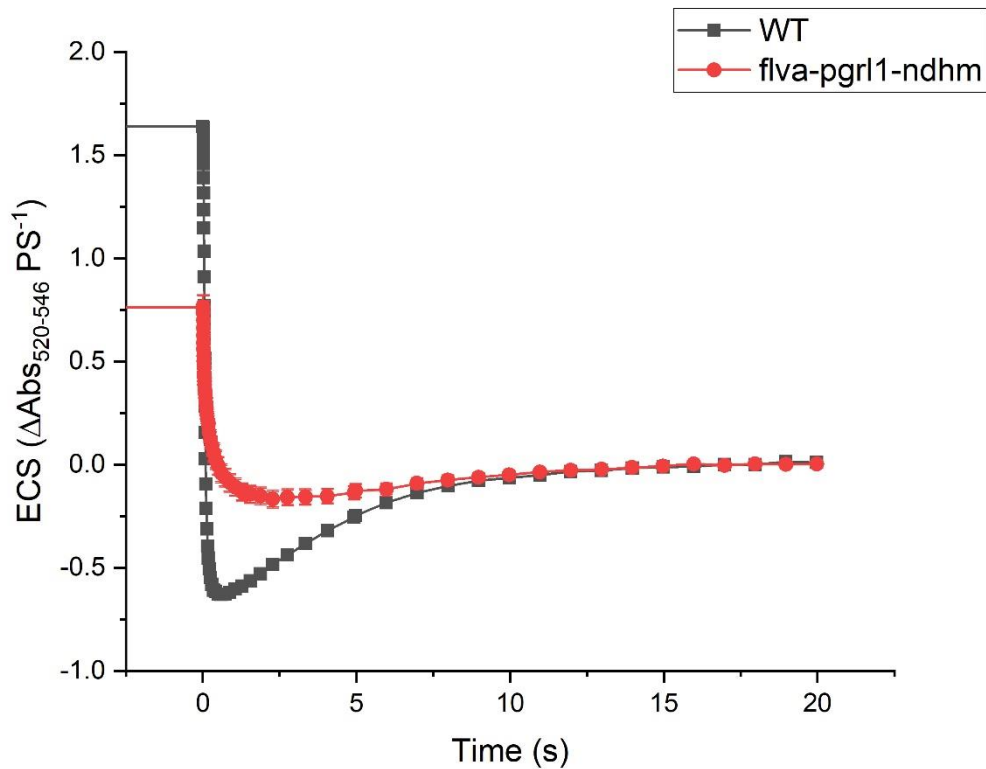

**Figure S4. Examples of ECS traces in WT and *flva-pgrl1-ndhm* mutant.** Dark adapted plants were subjected to  $940 \mu\text{mol photons m}^{-2} \text{s}^{-1}$  for 300s before light was switch off (0 s). Relaxation of electrochromic shift signal (520-546 nm) in the dark is reported for WT (black) and *flva-pgrl1-ndhm* KO (red). ECS signal is normalized to total photosystem content (PSI+PSII) calculated from single flash turnover.

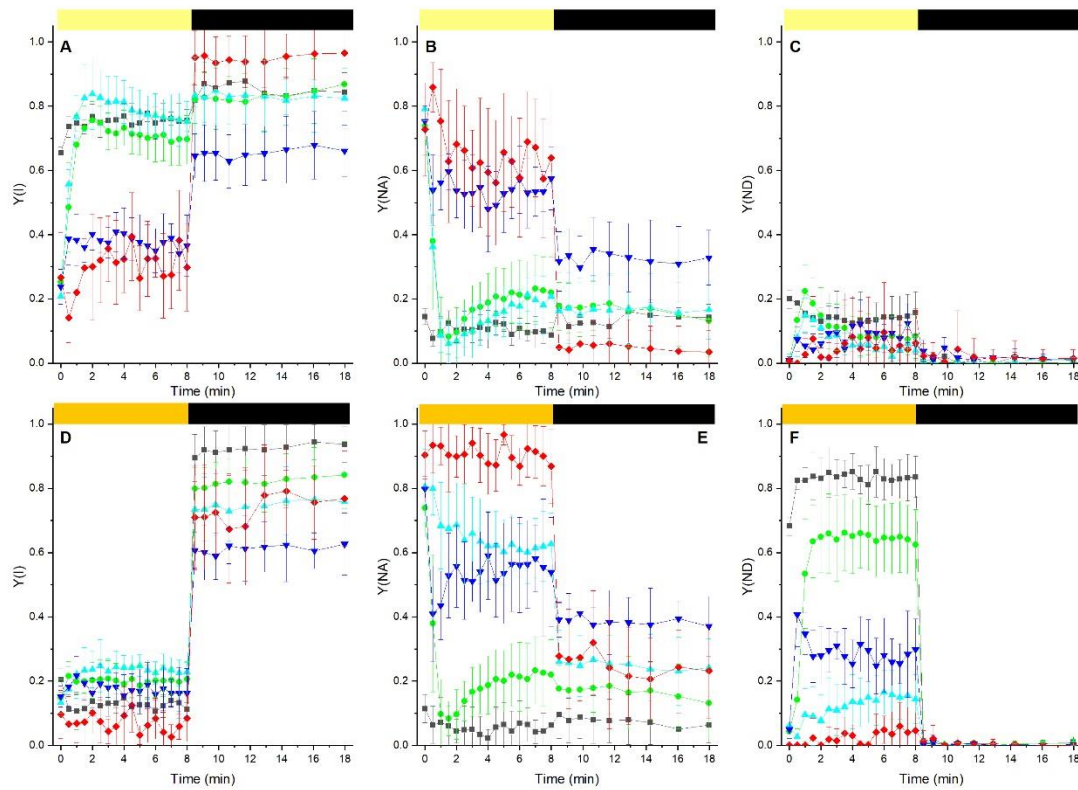

**Figure S5. Photosystems I functionality under dim / High illumination.** Yield of PSI (Y(I); A,D), PSI acceptor (Y(NA); B-E) and donor side limitation (Y(ND); C-F) were measured with Dual-PAM 100 under dim ( $50 \mu\text{mol photons m}^{-2}\text{s}^{-1}$ , A-C) or high ( $550 \mu\text{mol photons m}^{-2}\text{s}^{-1}$ , D-F) illumination. Actinic light (upper yellow bar) was switched off after 8 min. In all panels WT is shown in black, *flva-pgrl1* in cyan, *flva-ndhm* in green, *pgrl1-ndhm* in blue and *flva-pgrl1-ndhm* in red. Data are shown as average  $\pm$  SD ( $n > 4$ ).

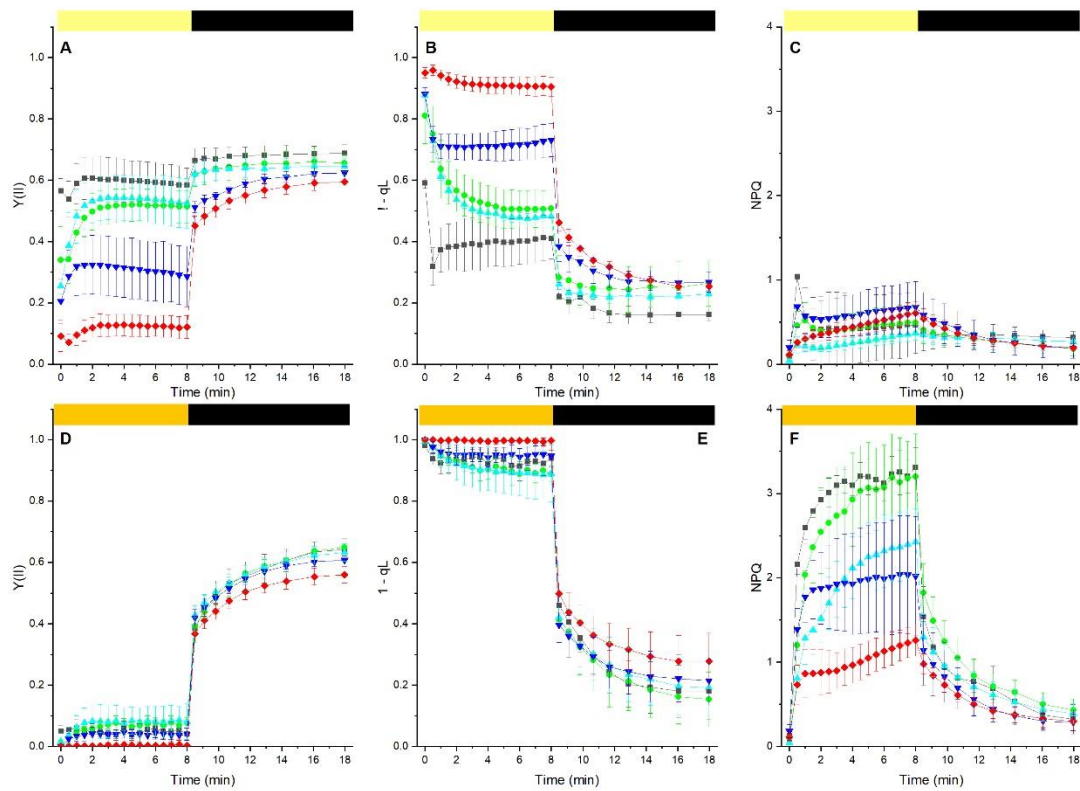

**Figure S6. Photosystem II functionality under dim / High illumination.** Yield of PSII (Y(II); A,D), PQ reox state (1-qL); B-E) and non-photochemical quenching (NPQ); C-F) were measured with Dual-PAM 100 under dim ( $50 \mu\text{mol photons m}^{-2}\text{s}^{-1}$ , A-C) or high ( $550 \mu\text{mol photons m}^{-2}\text{s}^{-1}$ , D-F) illumination. Actinic light (upper yellow bar) was switched off after 8 min. In all panels WT is shown in black, *flva-pgrl1* in cyan, *flva-ndhm* in green, *pgrl1-ndhm* in blue and *flva-pgrl1-ndhm* in red. Data are shown as average  $\pm$  SD ( $n > 4$ ).

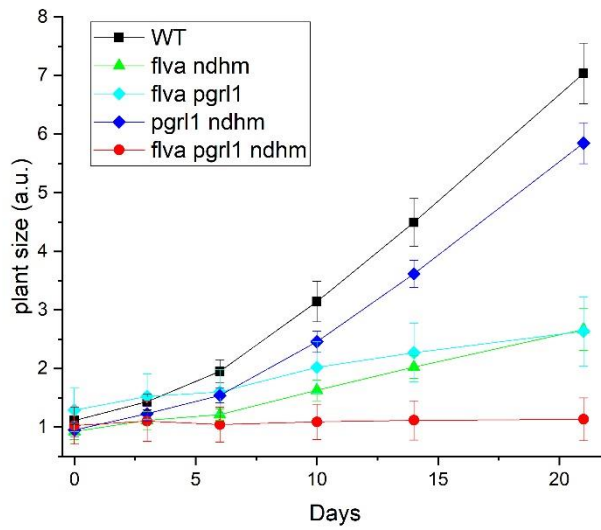

**Figure S7. Example of growth curve *P. patens* mutants.** *P. patens* WT and mutants were grown under light fluctuations (FL) where 3 minute at 525  $\mu\text{mol photons m}^{-2} \text{s}^{-1}$  was followed by 9 minutes at 25  $\mu\text{mol photons m}^{-2} \text{s}^{-1}$ . After 21 days (see Figure 1), plants were still actively growing. Plant growth was quantified from image analysis as detailed in (Storti et al., 2019), plant sizes were normalized to WT initial size at day 0. WT, *pgrl1-ndhm*, *pgrl1-flva*, *ndhm-flva* and triple *flva-pgrl1-ndhm* KO are shown respectively in black, blue, cyan, green and red.

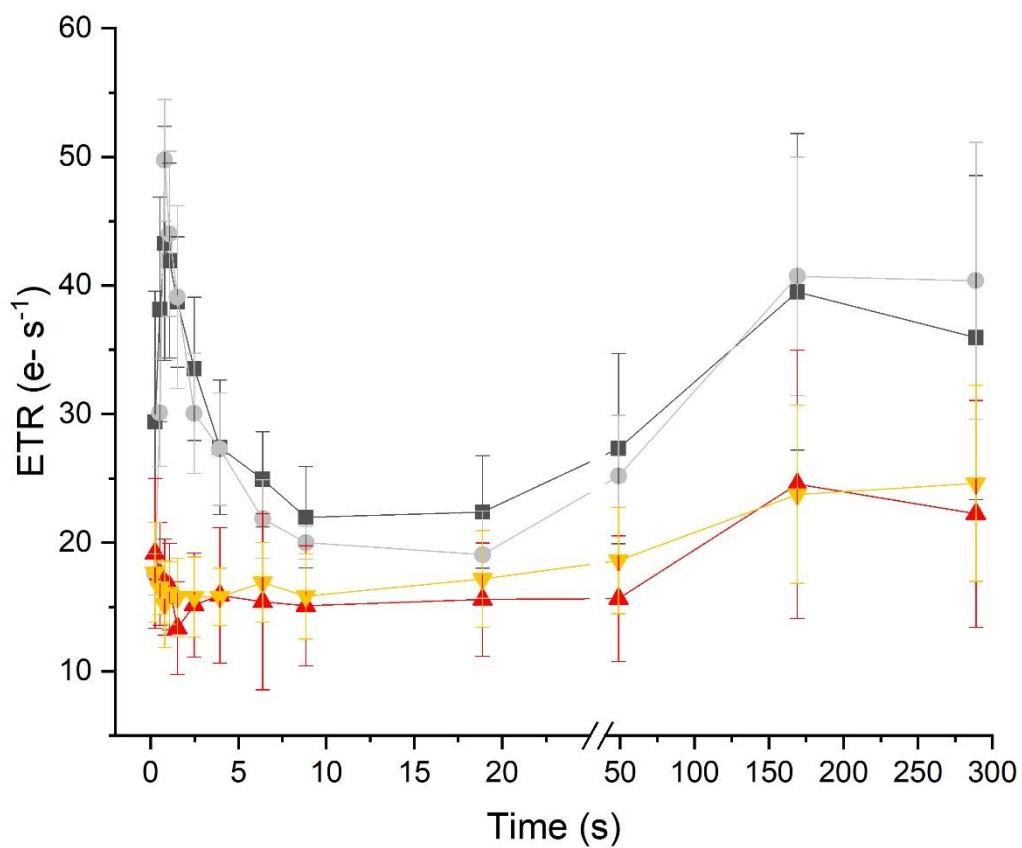

**Figure S8. Photosynthetic ETR in plants grown heterotrophically.** Electron transport rate, calculated from electrochromic shift signal, was measured on plants grown in PpNO<sub>3</sub> medium or PpNO<sub>3</sub> with the addition of 0.5 % glucose. WT and *flva-pgr11-ndhm* KO grown in PpNO<sub>3</sub> are represented respectively in black and red, WT and mutant grown in enriched medium are represented in grey and orange. Data are shown as average  $\pm$  SD ( $n > 3$ ).

## Parsed Citations

**Alboresi, A, Gerotto, C., Giacometti, G.M., Bassi, R., Morosinotto, T. (2010).** Physcomitrella patens mutants affected on heat dissipation clarify the evolution of photoprotection mechanisms upon land colonization. *Proc. Natl. Acad. Sci. U. S. A* 107: 11128–33.

Pubmed: [Author and Title](#)

Google Scholar: [Author Only](#) [Title Only](#) [Author and Title](#)

**Alboresi, A, Storti, M., and Morosinotto, T. (2019).** Balancing protection and efficiency in the regulation of photosynthetic electron transport across plant evolution. *New Phytol.* 221: 105–109.

Pubmed: [Author and Title](#)

Google Scholar: [Author Only](#) [Title Only](#) [Author and Title](#)

**Allahverdiyeva, Y., Mustila, H., Ermakova, M., Bersanini, L., Richaud, P., Ajlani, G., Battchikova, N., Cournac, L., and Aro, E.-M. (2013).** Flavodiiron proteins Flv1 and Flv3 enable cyanobacterial growth and photosynthesis under fluctuating light. *Proc. Natl. Acad. Sci. U. S. A* 110: 4111–6.

Pubmed: [Author and Title](#)

Google Scholar: [Author Only](#) [Title Only](#) [Author and Title](#)

**Allahverdiyeva, Y., Suorsa, M., Tikkanen, M., and Aro, E.-M.E.-M. (2015).** Photoprotection of photosystems in fluctuating light intensities. *J. Exp. Bot.* 66: 2427–36.

Pubmed: [Author and Title](#)

Google Scholar: [Author Only](#) [Title Only](#) [Author and Title](#)

**Allen, G.C., Flores-Vergara, M.A., Krasynanski, S., Kumar, S., and Thompson, W.F. (2006).** A modified protocol for rapid DNA isolation from plant tissues using cetyltrimethylammonium bromide. *Nat. Protoc.* 1: 2320–2325.

Pubmed: [Author and Title](#)

Google Scholar: [Author Only](#) [Title Only](#) [Author and Title](#)

**Allorent, G., Osorio, S., Vu, J.L., Falconet, D., Jouhet, J., Kuntz, M., Fernie, A.R., Lerbs-Mache, S., Macherel, D., Courtois, F., and Finazzi, G. (2015).** Adjustments of embryonic photosynthetic activity modulate seed fitness in *Arabidopsis thaliana*. *New Phytol.* 205: 707–19.

Pubmed: [Author and Title](#)

Google Scholar: [Author Only](#) [Title Only](#) [Author and Title](#)

**Arnon, D.I. and Chain, R.K. (1975).** Regulation of ferredoxin-catalyzed photosynthetic phosphorylations. *Proc. Natl. Acad. Sci. U. S. A* 72: 4961–5.

Pubmed: [Author and Title](#)

Google Scholar: [Author Only](#) [Title Only](#) [Author and Title](#)

**Asada, K. (2000).** The water-water cycle as alternative photon and electron sinks. *Philos. Trans. R. Soc. B Biol. Sci.* 355: 1419–1431.

Pubmed: [Author and Title](#)

Google Scholar: [Author Only](#) [Title Only](#) [Author and Title](#)

**Avenson, T.J., Cruz, J.A., Kanazawa, A., and Kramer, D.M. (2005).** Regulating the proton budget of higher plant photosynthesis. *Proc. Natl. Acad. Sci. U. S. A* 102: 9709–13.

Pubmed: [Author and Title](#)

Google Scholar: [Author Only](#) [Title Only](#) [Author and Title](#)

**Bellan, A, Bucci, F., Perin, G., Alboresi, A., and Morosinotto, T. (2019).** Photosynthesis regulation in response to fluctuating light in the secondary endosymbiont alga *Nannochloropsis gaditana*. *Plant Cell Physiol.*

Pubmed: [Author and Title](#)

Google Scholar: [Author Only](#) [Title Only](#) [Author and Title](#)

**Chaux, F., Burlacot, A, Mekhalfi, M., Auroy, P., Blangy, S., Richaud, P., and Peltier, G. (2017).** Flavodiiron Proteins Promote Fast and Transient O<sub>2</sub> Photoreduction in *Chlamydomonas*. *Plant Physiol.* 174: 1825–1836.

Pubmed: [Author and Title](#)

Google Scholar: [Author Only](#) [Title Only](#) [Author and Title](#)

**DalCorso, G., Pesaresi, P., Masiero, S., Aseeva, E., Schünemann, D., Finazzi, G., Joliot, P., Barbato, R., and Leister, D. (2008).** A complex containing PGRL1 and PGR5 is involved in the switch between linear and cyclic electron flow in *Arabidopsis*. *Cell* 132: 273–85.

Pubmed: [Author and Title](#)

Google Scholar: [Author Only](#) [Title Only](#) [Author and Title](#)

**Driever, S.M. and Baker, N.R. (2011).** The water-water cycle in leaves is not a major alternative electron sink for dissipation of excess excitation energy when CO<sub>2</sub> assimilation is restricted. *Plant. Cell Environ.* 34: 837–846.

Pubmed: [Author and Title](#)

Google Scholar: [Author Only](#) [Title Only](#) [Author and Title](#)



Edwards, K., Johnstone, C., and Thompson, C. (1991). A simple and rapid method for the preparation of plant genomic DNA for PCR analysis. *Nucleic Acids Res.* 19: 1349.

Pubmed: [Author and Title](#)

Google Scholar: [Author Only](#) [Title Only](#) [Author and Title](#)

Endo, T., Shikanai, T., Takabayashi, A., Asada, K., and Sato, F. (1999). The role of chloroplastic NAD(P)H dehydrogenase in photoprotection. *FEBS Lett.* 457: 5–8.

Pubmed: [Author and Title](#)

Google Scholar: [Author Only](#) [Title Only](#) [Author and Title](#)

Gerotto, C., Alboresi, A., Giacometti, G.M.G.M., Bassi, R., and Morosinotto, T. (2012). Coexistence of plant and algal energy dissipation mechanisms in the moss *Physcomitrella patens*. *New Phytol.* 196: 763–73.

Pubmed: [Author and Title](#)

Google Scholar: [Author Only](#) [Title Only](#) [Author and Title](#)

**Gerotto, C., Alboresi, A., Meneghesso, A., Jokel, M., Suorsa, M., Aro, E.-M.E.M., and Morosinotto, T. (2016). Flavodiiron proteins act as safety valve for electrons in *Physcomitrella patens* (National Academy of Sciences).**

Hertle, A.P., Blunder, T., Wunder, T., Pesaresi, P., Pribil, M., Armbruster, U., and Leister, D. (2013). PGRL1 is the elusive ferredoxin-plastoquinone reductase in photosynthetic cyclic electron flow. *Mol. Cell* 49: 511–23.

Pubmed: [Author and Title](#)

Google Scholar: [Author Only](#) [Title Only](#) [Author and Title](#)

Ilik, P., Pavlovič, A., Kouřil, R., Alboresi, A., Morosinotto, T., Allahverdiyeva, Y., Aro, E.-M., Yamamoto, H., and Shikanai, T. (2017). Alternative electron transport mediated by flavodiiron proteins is operational in organisms from cyanobacteria up to gymnosperms. *New Phytol.* 214.

Pubmed: [Author and Title](#)

Google Scholar: [Author Only](#) [Title Only](#) [Author and Title](#)

Ishikawa, N., Endo, T., and Sato, F. (2008). Electron transport activities of *Arabidopsis thaliana* mutants with impaired chloroplastic NAD(P)H dehydrogenase. *J. Plant Res.* 121: 521–526.

Pubmed: [Author and Title](#)

Google Scholar: [Author Only](#) [Title Only](#) [Author and Title](#)

Ishikawa, N., Takabayashi, A., Noguchi, K., Tazoe, Y., Yamamoto, H., von Caemmerer, S., Sato, F., and Endo, T. (2016). NDH-Mediated Cyclic Electron Flow Around Photosystem I is Crucial for C 4 Photosynthesis. *Plant Cell Physiol.* 57: 2020–2028.

Pubmed: [Author and Title](#)

Google Scholar: [Author Only](#) [Title Only](#) [Author and Title](#)

Järvi, S., Suorsa, M., and Aro, E.-M. (2015). Photosystem II repair in plant chloroplasts - Regulation, assisting proteins and shared components with photosystem II biogenesis. *Biochim. Biophys. Acta - Bioenerg.* 1847: 900–909.

Pubmed: [Author and Title](#)

Google Scholar: [Author Only](#) [Title Only](#) [Author and Title](#)

Järvi, S., Suorsa, M., Paakkarinen, V., and Aro, E.-M. (2011). Optimized native gel systems for separation of thylakoid protein complexes: novel super- and mega-complexes. *Biochem. J.* 439: 207–14.

Pubmed: [Author and Title](#)

Google Scholar: [Author Only](#) [Title Only](#) [Author and Title](#)

Joliot, P., Béal, D., and Joliot, A. (2004). Cyclic electron flow under saturating excitation of dark-adapted *Arabidopsis* leaves. *Biochim. Biophys. Acta* 1656: 166–76.

Pubmed: [Author and Title](#)

Google Scholar: [Author Only](#) [Title Only](#) [Author and Title](#)

Joliot, P. and Johnson, G.N. (2011). Regulation of cyclic and linear electron flow in higher plants. *Proc. Natl. Acad. Sci. U. S. A.* 108: 13317–22.

Pubmed: [Author and Title](#)

Google Scholar: [Author Only](#) [Title Only](#) [Author and Title](#)

Kügler, M., Jansch, L., Kruff, V., Schmitz, U.K., and Braun, H.P. (1997). Analysis of the chloroplast protein complexes by blue-native polyacrylamide gel electrophoresis (BN-PAGE). *Photosynth. Res.* 53: 35–44.

Pubmed: [Author and Title](#)

Google Scholar: [Author Only](#) [Title Only](#) [Author and Title](#)

Kukuczka, B., Magneschi, L., Petroustos, D., Steinbeck, J., Bald, T., Powikrowska, M., Fufezan, C., Finazzi, G., and Hippler, M. (2014). Proton Gradient Regulation5-Like1-Mediated Cyclic Electron Flow Is Crucial for Acclimation to Anoxia and Complementary to Nonphotochemical Quenching in Stress Adaptation. *Plant Physiol.* 165: 1604–1617.

Pubmed: [Author and Title](#)

Google Scholar: [Author Only](#) [Title Only](#) [Author and Title](#)

Kulheim, C., Agren, J., Jansson, S., Külheim, C., Agren, J., and Jansson, S. (2002). Rapid regulation of light harvesting and plant

**fitness in the field. *Science* 297: 91–3.**

Pubmed: [Author and Title](#)

Google Scholar: [Author Only](#) [Title Only](#) [Author and Title](#)

**Larosa, V., Meneghesso, A., La Rocca, N., Steinbeck, J., Hippler, M., Szabò, I., and Morosinotto, T. (2018). Mitochondria Affect Photosynthetic Electron Transport and Photosensitivity in a Green Alga. *Plant Physiol.* 176: 2305–2314.**

Pubmed: [Author and Title](#)

Google Scholar: [Author Only](#) [Title Only](#) [Author and Title](#)

**Munekage, Y., Hashimoto, M., Miyake, C., Tomizawa, K., Endo, T., Tasaka, M., and Shikanai, T. (2004). Cyclic electron flow around photosystem I is essential for photosynthesis. *Nature* 429: 579–82.**

Pubmed: [Author and Title](#)

Google Scholar: [Author Only](#) [Title Only](#) [Author and Title](#)

**Munekage, Y., Hojo, M., Meurer, J., Endo, T., Tasaka, M., and Shikanai, T. (2002). PGR5 is involved in cyclic electron flow around photosystem I and is essential for photoprotection in *Arabidopsis*. *Cell* 110: 361–71.**

Pubmed: [Author and Title](#)

Google Scholar: [Author Only](#) [Title Only](#) [Author and Title](#)

**Nawrocki, W.J., Bailleul, B., Cardol, P., Rappaport, F., Wollman, F.-A., and Joliot, P. (2019). Maximal cyclic electron flow rate is independent of PGRL1 in *Chlamydomonas*. *Biochim. Biophys. Acta. Bioenerg.***

Pubmed: [Author and Title](#)

Google Scholar: [Author Only](#) [Title Only](#) [Author and Title](#)

**Peltier, G., Aro, E.-M., and Shikanai, T. (2016). NDH-1 and NDH-2 Plastoquinone Reductases in Oxygenic Photosynthesis. *Annu. Rev. Plant Biol.* 67: 55–80.**

Pubmed: [Author and Title](#)

Google Scholar: [Author Only](#) [Title Only](#) [Author and Title](#)

**Peltier, G., Tolleter, D., Billon, E., and Cournac, L. (2010). Auxiliary electron transport pathways in chloroplasts of microalgae. *Photosynth. Res.* 106: 19–31.**

Pubmed: [Author and Title](#)

Google Scholar: [Author Only](#) [Title Only](#) [Author and Title](#)

**Shikanai, T. (2014). Central role of cyclic electron transport around photosystem I in the regulation of photosynthesis. *Curr. Opin. Biotechnol.* 26: 25–30.**

Pubmed: [Author and Title](#)

Google Scholar: [Author Only](#) [Title Only](#) [Author and Title](#)

**Shikanai, T. (2016). Regulatory network of proton motive force: contribution of cyclic electron transport around photosystem I. *Photosynth. Res.* 129: 1–8.**

Pubmed: [Author and Title](#)

Google Scholar: [Author Only](#) [Title Only](#) [Author and Title](#)

**Shikanai, T., Endo, T., Hashimoto, T., Yamada, Y., Asada, K., and Yokota, A. (1998). Directed disruption of the tobacco *ndhB* gene impairs cyclic electron flow around photosystem I. *Proc. Natl. Acad. Sci. U. S. A.* 95: 9705–9.**

Pubmed: [Author and Title](#)

Google Scholar: [Author Only](#) [Title Only](#) [Author and Title](#)

**Shikanai, T. and Yamamoto, H. (2017). Contribution of Cyclic and Pseudo-cyclic Electron Transport to the Formation of Proton Motive Force in Chloroplasts. *Mol. Plant* 10: 20–29.**

Pubmed: [Author and Title](#)

Google Scholar: [Author Only](#) [Title Only](#) [Author and Title](#)

**Shimakawa, G., Murakami, A., Niwa, K., Matsuda, Y., Wada, A., and Miyake, C. (2018). Comparative analysis of strategies to prepare electron sinks in aquatic photoautotrophs. *Photosynth. Res.***

Pubmed: [Author and Title](#)

Google Scholar: [Author Only](#) [Title Only](#) [Author and Title](#)

**Storti, M., Alboresi, A., Gerotto, C., Aro, E.-M., Finazzi, G., and Morosinotto, T. (2019). Role of cyclic and pseudo-cyclic electron transport in response to dynamic light changes in *Physcomitrella patens*. *Plant. Cell Environ.* 42: 1590–1602.**

Pubmed: [Author and Title](#)

Google Scholar: [Author Only](#) [Title Only](#) [Author and Title](#)

**Suorsa, M., Järvi, S., Grieco, M., Nurmi, M., Pietrzykowska, M., Rantala, M., Kangasjärvi, S., Paakkanen, V., Tikkanen, M., Jansson, S., and Aro, E.-M. (2012). PROTON GRADIENT REGULATION5 is essential for proper acclimation of *Arabidopsis* photosystem I to naturally and artificially fluctuating light conditions. *Plant Cell* 24: 2934–48.**

Pubmed: [Author and Title](#)

Google Scholar: [Author Only](#) [Title Only](#) [Author and Title](#)

**Terashima, I., Funayama, S., and Sonoike, K. (1994). The site of photoinhibition in leaves of *Cucumis sativus* L. at low**

**temperatures is photosystem I, not photosystem II. *Planta* 193.**

Pubmed: [Author and Title](#)

Google Scholar: [Author Only](#) [Title Only](#) [Author and Title](#)

**Tikkanen, M., Mekala, N.R., and Aro, E.-M. (2014). Photosystem II photoinhibition-repair cycle protects Photosystem I from irreversible damage. *Biochim. Biophys. Acta* 1837: 210–5.**

Pubmed: [Author and Title](#)

Google Scholar: [Author Only](#) [Title Only](#) [Author and Title](#)

**Tiwari, A., Mamedov, F., Grieco, M., Suorsa, M., Jajoo, A., Styring, S., Tikkanen, M., and Aro, E.-M. (2016). Photodamage of iron–sulphur clusters in photosystem I induces non-photochemical energy dissipation. *Nat. Plants*: 16035.**

Pubmed: [Author and Title](#)

Google Scholar: [Author Only](#) [Title Only](#) [Author and Title](#)

**Tjus, S.E., Møller, B.L., and Scheller, H. V (1998). Photosystem I is an early target of photoinhibition in barley illuminated at chilling temperatures. *Plant Physiol.* 116: 755–64.**

Pubmed: [Author and Title](#)

Google Scholar: [Author Only](#) [Title Only](#) [Author and Title](#)

**Wada, S., Yamamoto, H., Suzuki, Y., Yamori, W., Shikanai, T., and Makino, A (2018). Flavodiiron Protein Substitutes for Cyclic Electron Flow without Competing CO<sub>2</sub> Assimilation in Rice. *Plant Physiol.* 176: 1509–1518.**

Pubmed: [Author and Title](#)

Google Scholar: [Author Only](#) [Title Only](#) [Author and Title](#)

**Yamamoto, H., Takahashi, S., Badger, M.R., and Shikanai, T. (2016). Artificial remodelling of alternative electron flow by flavodiiron proteins in *Arabidopsis*. *Nat. plants* 2: 16012.**

Pubmed: [Author and Title](#)

Google Scholar: [Author Only](#) [Title Only](#) [Author and Title](#)

**Yamori, W. and Shikanai, T. (2016). Physiological Functions of Cyclic Electron Transport Around Photosystem I in Sustaining Photosynthesis and Plant Growth. *Annu. Rev. Plant Biol.* 67: 81–106.**

Pubmed: [Author and Title](#)

Google Scholar: [Author Only](#) [Title Only](#) [Author and Title](#)

**Yamori, W., Shikanai, T., and Makino, A (2015). Photosystem I cyclic electron flow via chloroplast NADH dehydrogenase-like complex performs a physiological role for photosynthesis at low light. *Sci. Rep.* 5: 13908.**

Pubmed: [Author and Title](#)

Google Scholar: [Author Only](#) [Title Only](#) [Author and Title](#)
